# Supplementary material for: Stable carbon and nitrogen isotopic composition of leaves, litter, and soils of various tropical ecosystems along an elevational and land-use gradient at Mount Kilimanjaro, Tanzania
Source: Copernicus journal article supplement (doi:10.5194/bg-2018-407), 2018-10-22
Supplement: Supplementary file [file bg-2018-407-AC4-supplement.pdf]

1 **Stable carbon and nitrogen isotopic composition of leaves, litter, and**  
2 **soils of various ecosystems along an elevational and land-use**  
3 **gradient at Mount Kilimanjaro, Tanzania**

Deleted: tropical

4 Friederike Gerschlauser<sup>1</sup>, Gustavo Saiz<sup>2,1\*</sup>, David Schellenberger Costa<sup>3</sup>, Michael Kleyer<sup>3</sup>, Michael  
5 Dannenmann<sup>1</sup>, Ralf Kiese<sup>1</sup>

6 <sup>1</sup> Institute of Meteorology and Climate Research, Karlsruhe Institute of Technology, Garmisch-Partenkirchen, Germany

7 <sup>2</sup> Department of Environmental Chemistry, Faculty of Sciences, Universidad Católica de la Santísima Concepción,  
8 Concepción, Chile

9 <sup>3</sup> Department of Biology and Environmental Sciences, University of Oldenburg, Oldenburg, Germany

10 *Correspondence to:* Gustavo Saiz (gsaiz@ucsc.cl)

11 **Abstract**

12 Variations in the stable isotopic composition of carbon ( $\delta^{13}\text{C}$ ) and nitrogen ( $\delta^{15}\text{N}$ ) of fresh leaves, litter and topsoils were  
13 used to characterize soil organic matter dynamics of twelve tropical ecosystems in the Mount Kilimanjaro region, Tanzania.

14 We studied a total of 60 sites distributed along five individual elevational transects (860 – 4,550 m a.s.l.), which define a  
15 strong climatic and land use gradient encompassing semi-natural and managed ecosystems. The combined effects of  
16 contrasting environmental conditions, vegetation, soil, and management practices had a strong impact on the  $\delta^{13}\text{C}$  and  $\delta^{15}\text{N}$   
17 values observed in the different ecosystems. The relative abundance of  $\text{C}_3$  and  $\text{C}_4$  plants greatly determined the  $\delta^{13}\text{C}$  of a  
18 given ecosystem. In contrast,  $\delta^{15}\text{N}$  values were largely controlled by land-use intensification and climatic conditions. Both

19  $\delta^{15}\text{N}$  values and calculated  $\delta^{15}\text{N}$ -based enrichment factors ( $\delta^{15}\text{N}_{\text{litter}} - \delta^{15}\text{N}_{\text{soil}}$ ) suggest tightest nitrogen cycling at high-  
20 elevation (>3,000 m a.s.l.) ecosystems, and more open nitrogen cycling both in grass-dominated and intensively managed

Deleted: indicate

21 cropping systems. However, claims about the nature of the N cycle (i.e. open/close) should not be made solely on the basis  
22 of soil  $\delta^{15}\text{N}$  as other processes that barely discriminate against  $^{15}\text{N}$  (i.e. soil nitrate leaching) have been shown to be quite  
23 significant in Mt Kilimanjaro's forest ecosystems. The negative correlation of  $\delta^{15}\text{N}$  values with soil nitrogen content and the  
24 positive correlation with mean annual temperature suggest reduced mineralisation rates, and thus limited nitrogen  
25 availability, at least in high-elevation ecosystems. By contrast, intensively managed systems are characterized by lower soil  
26 nitrogen contents and warmer conditions, leading together with nitrogen fertilizer inputs to lower nitrogen retention, and  
27 thus, significantly higher soil  $\delta^{15}\text{N}$  values. A simple function driven by soil nitrogen content and mean annual temperature

30 explained 68 % of the variability in soil  $\delta^{15}\text{N}$  values across all sites. Based on our results, we suggest that in addition to land  
31 use intensification, increasing temperatures in a changing climate may promote soil carbon and nitrogen losses, thus altering  
32 the otherwise stable soil organic matter dynamics of Mt. Kilimanjaro's forest ecosystems.

### 33 **1 Introduction**

34 Conversion of natural ecosystems to agriculture is a worldwide phenomenon, which is of particular significance in tropical  
35 regions where human population growth rates are currently the highest (FAO and JRC, 2012). Changes in climate and land-  
36 use significantly alter vegetation composition and biogeochemical cycles, causing a strong impact on carbon (C) and  
37 nitrogen (N) turnover and stocks (Smith et al., 2014). Tropical forest biomes are particularly relevant in this context, as they  
38 are significant C storages and N turnover hotspots (Bai et al., 2012; Hedin et al., 2009; Lewis et al., 2009; Pan et al., 2011;  
39 Vitousek, 1984). Considering the increasing pressure on natural land, it gets even more crucial to understand how  
40 anthropogenic interventions affect ecosystem C and N cycling, and gain better knowledge about the main drivers of nutrient  
41 cycling, and associated exchange processes with the atmosphere and hydrosphere in tropical environments.

42 Research exploiting the natural abundance of stable isotopes has proved quite suitable for investigating potential impacts of  
43 land-use and/or climate change on C and N cycling in terrestrial systems (Michener and Lajtha, 2007; Pannetieri et al., 2017;  
44 Saiz et al., 2015a). Variations in the stable isotopic composition of C ( $\delta^{13}\text{C}$ ) and N ( $\delta^{15}\text{N}$ ) in plants and soils are the result of  
45 fractionation processes occurring during ecosystem exchange of C and N. Thus,  $\delta^{13}\text{C}$  and  $\delta^{15}\text{N}$  can serve as valuable  
46 indicators about ecosystem state and provide useful insights on how these systems respond to biotic and abiotic factors  
47 (Dawson et al., 2002; Höglberg, 1997; Ma et al., 2012; Pardo and Nadelhoffer, 2010; Peterson and Fry, 1987; Robinson,  
48 2001).

49 Plants discriminate against  $^{13}\text{C}$  (carbon dioxide) during photosynthetic  $\text{CO}_2$  fixation depending on plant metabolism (i.e.  
50  $\text{C}_3$  and  $\text{C}_4$  photosynthetic pathways). Most tropical grasses typically employ the  $\text{C}_4$  photosynthetic pathway ( $\delta^{13}\text{C}$  values  $>-$   
51  $15\text{‰}$ ), while trees and shrubs use the  $\text{C}_3$  photosynthetic pathway ( $\delta^{13}\text{C}$  values  $<-24\text{‰}$ ) (Bird et al., 1994; Bird and Pousai,  
52 1997; Cernusak et al., 2013; Farquhar et al., 1980). The distribution of  $\text{C}_3$  and  $\text{C}_4$  vegetation show clear patterns along  
53 elevational gradients, with increasing abundance of  $\text{C}_3$  species towards high elevations (Bird et al., 1994; Körner et al., 1991;  
54 Tieszen et al., 1979). Environmental conditions such as water availability also exert a significant influence on isotopic  
55 discrimination during atmospheric  $\text{CO}_2$  fixation. Accordingly, compared to optimal moisture conditions, water stress leads to  
56 enrichment of  $^{13}\text{C}$  in  $\text{C}_3$  plants (Farquhar and Sharkey, 1982), while this isotopic fractionation is less obvious or even absent  
57 in  $\text{C}_4$  plants (Ma et al., 2012; Swap et al., 2004).

58 The soil organic matter (SOM) pool integrates the isotopic signature of the precursor biomass over different spatiotemporal  
59 scales (Saiz et al., 2015a). Variation in soil  $\delta^{13}\text{C}$  values represents a valuable tool to better assess SOM dynamics,

60 mineralisation processes, or reconstruct past fire regimes (Saiz et al., 2015a; Wynn and Bird, 2007). The  $\delta^{13}\text{C}$  of SOM in a  
61 given ecosystem is greatly controlled by the relative abundance of  $\text{C}_3$  and  $\text{C}_4$  plants due to their contrasting C isotopic  
62 composition. Therefore, strong variations in soil  $\delta^{13}\text{C}$  can also be used to identify sources of particulate organic matter as  
63 well as vegetation shifts such as woody thickening. However, fractionation effects associated to differential stabilisation of  
64 SOM compounds, microbial re-processing of SOM, soil physico-chemical characteristics, and the terrestrial Seuss effect  
65 preclude a straightforward interpretation of soil  $\delta^{13}\text{C}$  values (Saiz et al., 2015a).

66 Plant and soil  $\delta^{15}\text{N}$  relate to environmental and management conditions controlling N turnover, availability, and losses.  $\delta^{15}\text{N}$   
67 values of soils are generally more positive than those of vegetation due to the relatively large isotopic fractionation occurring  
68 during soil N transformations (Dawson et al., 2002). The N-cycle of a given ecosystem may be characterized as closed, if  
69 both efficient microbial N retention and absence of external N-inputs (e.g. atmospheric deposition and fertilizer additions)  
70 prevent substantial gaseous and/or leaching N-losses. In contrast, open ecosystem N-cycling is characterized by significant  
71 inputs and losses of N. On the one hand, gaseous N losses from soils are strongly depleted in  $^{15}\text{N}$  due to the high  
72 fractionation factors associated to these processes (Denk et al., 2017). This results in high  $\delta^{15}\text{N}$  values of the residual  
73 substrate, which consequently leaves less importance to impacts of external N additions (Robinson, 2001; Zech et al., 2011).  
74 On the other hand, N leaching seems to only discriminate slightly against ecosystem  $^{15}\text{N}$ . According to Houlton and Bai  
75 (2009)  $\delta^{15}\text{N}$  values of drained water agree well with those of soils across various natural ecosystems worldwide. Moreover, it  
76 is also important to consider that soil  $\delta^{15}\text{N}$  may also be influenced by other factors including rooting depth, uptake of  
77 different N compounds, and symbiotic  $\text{N}_2$ -fixation (Nardoto et al., 2014). Variations in  $\delta^{15}\text{N}$  values of plants and soils have  
78 been successfully applied to characterize N cycling across a large variety of ecosystems worldwide (Amundson et al., 2003;  
79 Booth et al., 2005; Craine et al., 2015a, 2015b; Martinelli et al., 1999; Nardoto et al., 2014). This includes research work that  
80 has particularly focused on the study of N-losses derived from land-use changes or intensification (Eshetu and Högberg,  
81 2000; Piccolo et al., 1996; [Zech et al., 2011](#)).

82 Information on ecosystem C and N cycling is still scarce in many tropical ecosystems, particularly in remote regions of  
83 Africa (Abaker et al., 2016; 2018; Saiz et al., 2012; Townsend et al., 2011). Furthermore, feedbacks between C and N cycles  
84 such as limitations of N availability in ecosystem C sequestration and net primary productivity of tropical forest require  
85 urgent investigations (Gruber and Galloway, 2008; Zaehle, 2013). In such context, the Kilimanjaro region in Tanzania offers  
86 the rare possibility to study a broad range of tropical ecosystems across contrasting land-use management intensities and  
87 varying climatic conditions. This region hosts a large variety of semi-natural and managed ecosystems as a result of the  
88 strong elevational and land-use gradient.

89 We hypothesized that (i) vegetation composition ( $C_3/C_4$ ) is the main control for ecosystem  $\delta^{13}C$  values, whereas (ii)  $\delta^{15}N$   
90 values are rather controlled by land use management and climatic conditions. The main aim of this study is to evaluate the  
91 potential of  $\delta^{13}C$  and  $\delta^{15}N$  values in plant and soil material to assess C and N cycling across a broad variety of semi-natural  
92 and managed ecosystems under varying climatic conditions.

**Deleted:** We further hypothesized that (iii) intensively managed systems have more open N cycles as characterized by higher  $\delta^{15}N$  values compared to semi-natural forest ecosystems, which are likely N-limited.

## 93 2 Materials and Methods

### 94 2.1 Study Sites

95 This study was conducted on the southern slopes of Mount (Mt.) Kilimanjaro (3.07° S, 37.35° E, 5,895 m a.s.l.) in North-  
96 East Tanzania. The climate is characterized by a bimodal precipitation pattern with a major rainy season between March and  
97 May, and the other peak between October and November. Recently, Appelhans et al. (2016) used a network of 52  
98 meteorological stations strategically deployed in the Kilimanjaro region to measure air temperature and precipitation. They  
99 then used geo-statistical and machine-learning techniques for the gap filling of the recorded meteorological time series and  
100 their regionalization, which provides the means to calculate the meteorological data used for the complete set of sites (60  
101 used in our work. Please refer to Appelhans et al. (2016) for more details. Maximum mean annual precipitation (MAP) of  
102 2,552 mm occurs at an elevation of around 2,260 m a.s.l., decreasing towards lower as well as higher elevations, reaching  
103 657 and 1,208 mm  $y^{-1}$  at 871 and 4,550 m respectively (Table 1). Variations in air temperature are dominated by diurnal  
104 rather than seasonal patterns (Duane et al., 2008). Mean annual temperature (MAT) decreases with increasing elevation,  
105 ranging from 24.8 °C at 860 m to 3.5 °C at 4,550 m (Table 1).

**Deleted:** k

106 Five altitudinal transects ranging from 860 to 4,550 m a.s.l. were established along the mountain slopes. At each transect,  
107 twelve ecosystems occurring over a strong land use gradient encompassing intensively managed cropping systems and semi-  
108 natural stands were investigated. Hence, the total number of plots studied was 60 (5 transects x 12 ecosystems; Table 1 and  
109 Fig. 1). The cropping systems comprised multi-layer and multi-crop agroforestry homegardens (Hom), monoculture coffee  
110 plantations (Cof) with dispersed shading trees, and maize fields (Mai) subject to regular albeit moderate fertilizer and  
111 pesticide applications. Plant litter is regularly removed from Cof and Mai sites. Homegardens are manually ploughed, while  
112 combustion engine machinery is used for ploughing coffee plantations and maize fields. Coffee plantations are irrigated with  
113 drip irrigation systems. Both Hom and Cof sites still host indigenous forest trees that include *Albizia schimperi*, a species  
114 that may potentially fix atmospheric N. This is one of the 5 most abundant species in 2 and 4 of the Hom and Cof sites  
115 respectively, making up less than 25% of the vegetation cover in all cases. Grasslands (Gra) and savannas (Sav) are  
116 extensively managed by means of domestic grazing and occasional grass cutting, thus having significantly lower  
117 anthropogenic disturbances than cropping systems. Semi-natural ecosystems include several montane forest stands. These  
118 include lower montane (Flm), *Ocotea* (Foc), *Podocarpus* (Fpo), *Erica* (Fer), and alpine shrub vegetation *Helichrysum* (Hel).

**Deleted:** coffee

**Deleted:** maize

127 Even though lower montane forests are currently under protection they are still subject to sporadic illegal logging. In  
128 addition to sampling undisturbed forest ecosystems of *Ocotea* and *Podocarpus*, we purposely studied sites that had been  
129 affected by logging activities and fire events prior to the establishment of the Kilimanjaro National Park (Soini, 2005):  
130 *Ocotea* (Fod) and *Podocarpus* (Fpd) (Table 1). Erica forests represent Africa's highest forests in the subalpine zone. Higher  
131 above is the alpine zone, the realm of *Helichrysum* vegetation that is dominated by cushion plants and tussock grasses  
132 (Ensslin et al., 2015; Hemp, 2006). Potential ecosystem productivity and decomposition rates show a hump-shaped pattern  
133 resembling that of precipitation (Fig S1). It is interesting to see the close match between the two variables along the  
134 elevation range, albeit this trend weakens slightly towards higher elevation sites. Optimum growth and decomposition  
135 conditions are shown between 1,800 and 2,500 m.a.s.l.. These locations correspond to low altitude forest ecosystems (Flm  
136 and Foc) that do not experience severe seasonal limitations in moisture or temperature as it is otherwise the case in lower as  
137 well as higher elevation systems that are moisture and temperature limited respectively (Becker and Kuzyakov, 2018).

138 Detailed physico-chemical characteristics of the dominant soils are listed in Table 1. Soils in the Mt. Kilimanjaro region are  
139 mainly derived from volcanic rocks and ashes. The wide array of climatic conditions present along the elevational gradient  
140 influence soil genesis, which results in the occurrence of andosols at high elevations, and soils of more advanced genesis at  
141 lower elevations (e.g. nitosols) (Majule, 2003).

142 It is extremely difficult to provide reliable estimates of both fertilizers and pesticide rates used in small household farms in  
143 sub-Saharan Africa. This is because the actual use of these products is strongly dependent on both its availability in the  
144 local/regional market, the economic circumstances of each individual farmer, and individual perceptions about their use  
145 (Saiz and Albrecht, 2016). The only sites receiving fertilizer are the two monocultures: Maize (Mai) fields and Coffee (Cof)  
146 plantations, and to a lesser extent the homegardens (Hom) sites. In the latter sites Gütlein et al. (2018) report that weed  
147 control is mainly done by hand, and the use of mineral or organic N-fertilizers is low or non-existent. Extensively managed  
148 sites (i.e. Sav and Gra) receive varying amounts of organic inputs as a result of grazing activities, but again, their actual rates  
149 are unknown. A more detailed explanation on fertilizer and pesticides inputs used in the region is provided in the  
150 Supplementary Information.

## 151 **2.2 Sampling and Analyses**

152 Fieldwork took place in February and March in 2011 and 2012. Sampling was conducted on 50 x 50 m plots established at  
153 each of the 60 studied sites (12 ecosystems x 5 transects). Surface litter and mineral topsoil (0-5 cm) were sampled at five  
154 locations (four corners and the central point) at each plot. Additionally, fresh mature leaves of the five most abundant plant  
155 species covering 80% of total plant biomass per site were collected (Schellenberg Costa et al., 2017). All sampled materials  
156 (leaves, litter and soil) were air-dried until constant weight, and leaf material was subsequently oven-dried at 70 °C for 60

157 hours prior to grinding. Soil was sieved to 2 mm with visible root fragments being further removed prior to grinding with a  
158 mixer mill (MM200, Retsch, Haan Germany). Soil pH was determined with a pH meter (Multi Cal SenTix61, WTW,  
159 Weilheim, Germany) in a 0.01 M CaCl<sub>2</sub> solution, with a CaCl<sub>2</sub> to soil ratio of 2:1. Particle size distribution was determined  
160 gravimetrically using the pipette method (van Reeuwijk, 2002).

161 All soil, litter, and leaf samples were analysed with a dry combustion elemental analyzer (Costech International S.p.A.,  
162 Milano, Italy) fitted with a zero-blank autosampler coupled to a ThermoFinnigan DeltaPlus-XL using Continuous-Flow  
163 Isotope Ratio Mass Spectrometry (CF-IRMS) for determination of abundance of elemental C and N, and their stable isotopic  
164 composition ( $\delta^{13}\text{C}$ ,  $\delta^{15}\text{N}$ ). Precisions (standard deviations) on internal standards for elemental C and N concentrations and  
165 stable isotopic compositions were better than 0.08 % and 0.2 ‰ respectively.

166 Natural  $^{13}\text{C}$  or  $^{15}\text{N}$  abundances are expressed in  $\delta$  units according to Eq. (1):

$$167 \quad \delta (\text{‰}) = (R_{\text{sample}} - R_{\text{standard}} / R_{\text{standard}}) \times 1000, \quad (1)$$

168 where  $R_{\text{sample}}$  denotes the ratio  $^{13}\text{C}/^{12}\text{C}$  or  $^{15}\text{N}/^{14}\text{N}$  in the sample, and  $R_{\text{standard}}$  denotes the ratios in Pee Dee Belemnite or  
169 atmospheric N<sub>2</sub> (international standards for C and N, respectively). The average values for the plant samples were weighted  
170 considering their relative abundance at each site. Individual values for soil, litter, and leaves were averaged for each plot.

171 In addition,  $\delta^{15}\text{N}$ -based enrichment factors ( $\epsilon$ ) were calculated following Eq. (2):

$$172 \quad \epsilon = \delta^{15}\text{N}_{\text{litter}} - \delta^{15}\text{N}_{\text{soil}}, \quad (2)$$

173 These were used as indicators for ecosystem N status (Garten et al., 2008; Mariotti et al., 1981). Note that we use  $\delta^{15}\text{N}$   
174 values of litter material rather than fresh leaves from various species to calculate enrichment factors, since litter provides a  
175 more unbiased representation of the quality, quantity, and spatiotemporal dynamics of organic inputs entering the SOM pool  
176 (Saiz et al., 2015a).

### 177 2.3 Statistical Analysis

178 Normal distribution of the data was confirmed with the Shapiro-Wilk test. One-way ANOVA was performed to test for  
179 significant differences between ecosystems, while Tukey's HSD was used as post hoc procedure to test for significant  
180 differences across sites ( $P \leq 0.05$ ). Correlation analyses were performed to identify soil, foliar, and climatic variables  
181 influencing soil  $\delta^{15}\text{N}$  values. Subsequently, a principal component analysis (PCA) was conducted to reveal relationships  
182 between the main variables affecting soil  $\delta^{15}\text{N}$  values. The PCA was based on a correlation matrix including soil (C and N  
183 concentrations, C/N ratio,  $\delta^{13}\text{C}$ , pH values, sand and clay contents) as well as climatic parameters (MAT and MAP). A  
184 stepwise multiple regression was used to identify the main driving parameters determining soil  $\delta^{15}\text{N}$  across the elevational  
185 transect. All statistical analyses were conducted with R (version 3.2.2; R Core Team, 2015).

186 **3 Results**

187 **3.1 General soil characteristics**

188 Soil C and N contents were the highest in forest ecosystems and showed a decreasing trend towards managed sites (i.e.  
189 homegardens, grasslands, coffee and maize fields) (Table 1). Also, natural savannas and *Helichrysum* ecosystems had lower  
190 soil C and N values compared to forest ecosystems. The low temperatures and sandy nature of the *Helichrysum* sites play a  
191 strong role in their characteristically low productivity and moderate decomposition potentials (Table 1; Fig. S1), which  
192 unquestionably affects the comparatively low soil C and N contents of these alpine systems.  
193 An opposite trend to that of soil C and N abundance was observed for soil C/N ratios, whereby managed sites showed  
194 significantly lower values compared to those of semi-natural ecosystems. Soil pH values revealed acidic conditions at all  
195 sites, with the lowest values observed in forest sites having comparatively higher MAP (Table 1).

Deleted:

Deleted: is of particular significance, as this

Deleted: ir

Deleted: er

196 **3.2 Variation of  $\delta^{13}\text{C}$  values along the elevational and land-use gradient**

197 There were large variations in  $\delta^{13}\text{C}$  values along the elevational and land-use gradient, with distinct differences between  
198 managed and semi-natural ecosystems (Fig. 2). Compared to soils and litter, leaves invariably showed the lowest  $\delta^{13}\text{C}$  values  
199 in all the studied ecosystems, with the exception of grasslands and savannas that exhibited lower soil  $\delta^{13}\text{C}$  values than plant  
200 material.

201 The  $\delta^{13}\text{C}$  values of semi-natural ecosystems ranged between -32.8 and -24.1 ‰ (mean  $\pm$  SE: soil -26.0  $\pm$  0.2 ‰; litter -27.2  $\pm$   
202 0.2 ‰; leaves -29.3  $\pm$  0.3 ‰), showing a progressive reduction with decreasing elevation (i.e. from 4,500 to 1,750 m a.s.l.;

203 Fig. S2). The variation in  $\delta^{13}\text{C}$  values was much higher (-29.7 to -13.3 ‰) in managed ecosystems located at lower  
204 elevations (i.e. between 860 and 1,750 m a.s.l.; Fig. S2). The highest  $\delta^{13}\text{C}$  values were observed in  $\text{C}_4$ -dominated ecosystems  
205 (i.e. savannas, maize fields, and grasslands; soil -16.8  $\pm$  0.6 ‰, litter -19.3  $\pm$  0.8 ‰, leaves -18.8  $\pm$  1.1 ‰); while lower  $\delta^{13}\text{C}$   
206 values were obtained for coffee plantations and homegardens (soil -24.8  $\pm$  0.5 ‰, litter -27.2  $\pm$  0.4 ‰, leaves -27.3  $\pm$  0.4 ‰).  
207 Coffee plantations showed a slight influence of  $\text{C}_4$  vegetation in the soil data as a result of grasses growing between the rows  
208 of coffee plants. No significant variations were observed between  $\delta^{13}\text{C}$  values of soils and those of litter and leaves in the  
209 ecosystems with predominance of  $\text{C}_4$  vegetation (savannas, maize fields and grasslands). Exploratory data analyses revealed  
210 that in most cases, soil, litter, leaf, and climatic variables cross-correlated with each other (Table S1).

Deleted: S1

Deleted: S1

211 Figure 3 shows relatively small variations in  $\delta^{13}\text{C}$  enrichment factors ( $> -1.25$  ‰) both in undisturbed semi-natural and  
212 extensively managed sites along the elevational gradient, while managed and disturbed sites show higher and more variable  
213  $\delta^{13}\text{C}$  enrichment factors.

214 **3.3 Variation of  $\delta^{15}\text{N}$  values along the elevational and land-use gradient**

221 Significantly higher  $\delta^{15}\text{N}$  values were observed for all sampled materials in the intensively managed (cropping) systems  
222 compared to semi-natural and grass-dominated ecosystems (Fig. 4a). The  $\delta^{15}\text{N}$  values for managed systems ranged between -  
223 2.6 and 7.8 ‰ (mean  $\pm$  SE: soil  $5.6 \pm 0.3$  ‰, litter  $1.7 \pm 0.5$  ‰, leaves  $2.0 \pm 0.5$  ‰). By contrast, semi-natural ecosystems  
224 had considerably lower  $\delta^{15}\text{N}$  values, which ranged from -5.0 to 3.6 ‰ (soil  $1.5 \pm 0.2$  ‰, litter  $-2.1 \pm 0.2$  ‰, leaves  $-1.3 \pm 0.3$   
225 ‰). Soil  $\delta^{15}\text{N}$  values were significantly higher than those of leaves and litter across all the ecosystems studied, with the only  
226 exception of agroforestry homegardens (Fig. 4a).  $\delta^{15}\text{N}$  values of leaves and litter did not show significant differences within  
227 any given ecosystem.

Deleted: 3a

228 Calculated  $\delta^{15}\text{N}$ -based enrichment factors showed high variability across all ecosystems with values ranging from -7.5 to -  
229 1.6 ‰ (Fig. 4b). A differentiation between managed and natural ecosystems was less clear than for  $\delta^{15}\text{N}$  values. The most  
230 negative enrichment factors ( $< -4.0$  ‰) were observed for *Helichrysum*, *Erica*, *Podocarpus* disturbed, and grass-dominated  
231 ecosystems (savannas and grasslands). These enrichment factors were significantly less negative for montane forests at lower  
232 elevations (*Podocarpus*, *Ocotea* and lower montane) and intensively managed (cropping) systems (i.e. homegarden, coffee,  
233 and maize; Fig. 4b).

Deleted: 3a

Deleted: 3b

Deleted: 3b

### 234 3.4 Impacts of soil and climatic variables on soil $\delta^{15}\text{N}$ values

235 Two principal components (PC) explained 78.3 % of the total soil  $\delta^{15}\text{N}$  variation (Fig. 5). The first component explained  
236 55.8 % of the variability, and included soil chemistry and climatic variables (soil C and N concentrations, soil C/N ratio, soil  
237 pH, soil  $\delta^{13}\text{C}$ , MAP and MAT). Highly significant correlations ( $P < 0.001$ ) were obtained between PC 1 and the above  
238 factors ( $r = 0.93, 0.93, 0.61, -0.87, -0.76, 0.87, \text{ and } -0.63$ , respectively; Table S2). The second component explained an  
239 additional 22.5 % of soil  $\delta^{15}\text{N}$  variability and included soil texture (clay and sand contents) and MAT. These variables were  
240 highly correlated with PC 2 ( $r = -0.84, 0.82, \text{ and } -0.65$ ; Table S2). The principal component bi-plot showed a strong grouping  
241 between managed and semi-natural ecosystems (Fig. 5). Managed sites clustered around MAT, soil  $\delta^{13}\text{C}$ , and soil pH, while  
242  $\text{C}_4$ -dominated ecosystems (grassland, savannas, and maize fields) were preferentially influenced by the latter two variables.  
243 In contrast, semi-natural montane forest ecosystems, rather grouped around soil chemical properties such as C and N  
244 contents, C/N ratio, as well as MAP, while alpine *Helichrysum* ecosystems clustered around soil sand content.

Deleted: 4

Deleted: 4

245 In addition to PCA, multiple regression analyses were performed using a stepwise procedure that identified soil N content  
246 and MAT as the main driving variables explaining the variation in soil  $\delta^{15}\text{N}$ . A paraboloid model explained 68 % of this  
247 variability ( $P < 0.05$ ; Fig. 6). The combination of relatively high soil N contents (1 to 3 %), and low MAT (up to 14 °C),  
248 invariably corresponded to low soil  $\delta^{15}\text{N}$  values ( $< 2$  ‰) characteristic of semi-natural ecosystems. Conversely, the relatively  
249 high soil  $\delta^{15}\text{N}$  values ( $> 2$  ‰) observed in managed ecosystems corresponded to low soil N contents ( $< 1$  %) and  
250 comparatively high MAT (17 to 25 °C).

Deleted: 5



258 The relationship between soil  $\delta^{15}\text{N}$  values and climatic and edaphic variables provided valuable information about  
259 potentially different SOM dynamics in the various ecosystems studied, with data showing a clear differentiation between  
260 semi-natural and managed ecosystems (Fig. S4). The former is characterized by comparatively higher C/N ratios and lower  
261  $\delta^{15}\text{N}$  values (averaging 15.5 and 1.5 ‰ respectively), while the latter showed lower C/N ratios and higher soil  $\delta^{15}\text{N}$  values  
262 (averaging 11.9 and 3.5 ‰ respectively). Managed ecosystems further grouped into intensively cropped (homegardens,  
263 maize fields, and coffee plantations) and extensively managed grass-dominated ecosystems (savannas and grasslands).

Deleted: S3

Deleted: Soil  $\delta^{15}\text{N}$  values decreased with increasing soil N contents and MAP, while they increased with increasing MAT (Fig. S3).

## 264 4 Discussion

### 265 4.1 Factors influencing the variation of $\delta^{13}\text{C}$ values along the elevational and land-use gradient

266 The  $\delta^{13}\text{C}$  values of leaves in  $\text{C}_3$ -dominated (semi-natural) ecosystems in Mt. Kilimanjaro increased with elevation (Figs. 1  
267 and S2), which is in agreement with findings from other mountainous ecosystems in the tropics, Europe, and North America  
268 (Bird et al., 1994; Körner et al., 1991; Ortiz et al., 2016; Zhou et al., 2011; Zhu et al., 2009). The wider scatter of  $\delta^{13}\text{C}$  values  
269 observed in leaves relative to soils is most certainly due to the inherently large (inter- and intra- specific) variability of  $\delta^{13}\text{C}$   
270 in plants (Bird et al., 1994). Different tissues within the plant can present widely divergent  $\delta^{13}\text{C}$  values as a result of  
271 fractionation processes associated with the C compounds involved in their construction (Dawson et al., 2002). Moreover,  
272 other factors including light intensity, humidity, and the re-utilization of previously respired low  $^{13}\text{C}$ - $\text{CO}_2$  within the canopy  
273 may further contribute to the variability of  $\delta^{13}\text{C}$  in leaf tissues (Ometto et al., 2006; van der Merwe and Medina, 1989).

Deleted: S1

274 While fractionation effects preclude a straightforward interpretation of  $\delta^{13}\text{C}$  of SOM, this variable provides an integrated  
275 measure of the isotopic composition of the precursor biomass at the ecosystem level (Bird et al., 2004; Saiz et al., 2015a).

276 Mass balance calculations that assume (i) 5% (w/w) average root mass (< 2 mm) in soil samples, and (ii) leaves having  
277 similar isotopic signals as roots, show that the removal of visible sieved roots might cause a very small effect on soil isotopic  
278 values. This would amount to values ~0.15‰ higher than the original soil isotopic values, with such discrepancy being even  
279 smaller if root samples were considered having values 0.5-1‰ higher than leaves as is commonly reported in the literature  
280 (calculations not shown). Besides the natural variability of soil  $\delta^{13}\text{C}$  values observed in  $\text{C}_3$ -dominated semi-natural

281 ecosystems, there were distinct patterns in  $\delta^{13}\text{C}$  values of soil samples collected in extensively managed, low-elevation  
282 ecosystems where woody and grass vegetation coexist (i.e. grasslands and savannas), which indicate the strong influence  
283 exerted by  $\text{C}_4$  vegetation on the C isotopic composition of all sampled materials (Fig. 2). The results obtained in semi-natural  
284 ecosystems at Mt. Kilimanjaro fit well within the interpretative framework for elevational soil  $\delta^{13}\text{C}$  data proposed by Bird et  
285 al. (1994). These authors suggest that besides temperature and atmospheric pressure, other primary factors influencing soil  
286  $\delta^{13}\text{C}$  values are the age and degree of decomposition of SOM, as well as variables related to the characteristics of the canopy,

292 including the proportion of respired CO<sub>2</sub> that is recycled during photosynthesis, the relative contribution of leaf and woody  
293 litter to SOM, and soil moisture.

294 Besides the factors explained above, soil δ<sup>13</sup>C values are strongly influenced by the balance between ecosystem C inputs and  
295 outputs. It seems reasonable to assume that in the case of natural ecosystems there may be a steady state between SOM  
296 inputs and decomposition rates. This should be in contrast with the typically altered nutrient dynamics of disturbed systems,  
297 particularly those under agricultural management (Wang et al., 2018). Low fractionation factors in δ<sup>13</sup>C are commonly  
298 reported between plant material and topsoils in natural systems mainly because of the relatively limited humification of  
299 recent organic matter prevalent in topsoils (Acton et al., 2013; Wang et al., 2018). Thus, we hypothesized that if carbon  
300 inputs and outputs were roughly in balance, then the difference in δ<sup>13</sup>C values between plant material and topsoil would be  
301 smaller in undisturbed sites compared to managed or disturbed sites. The results shown in Fig. 3 agree well with this notion.

302 Soil δ<sup>13</sup>C values decreased with increasing MAP and decreasing MAT, which also corresponded with higher SOC contents  
303 (Fig. S3). This suggests that the relatively cooler and wetter conditions of high elevation semi-natural forest ecosystems (i.e.  
304 Foc, Fpo) promote the accumulation of SOM, which is similar to previous findings of work conducted along elevational  
305 gradients (Bird et al., 1994; Kohn, 2010). Compared to high-elevation locations, the climatic conditions of mid-elevation  
306 ecosystems are more favourable for the activities of SOM decomposers, as these sites are consistently warmer and drier than  
307 the characteristically cool and occasionally waterlogged high-altitude ecosystems (Fig. S1; Becker and Kuzyakov, 2018;  
308 Borken and Matzner, 2009; Garten et al., 2009; Kirschbaum, 1995; Leirós et al., 1999). The comparatively high soil δ<sup>13</sup>C  
309 values observed in the disturbed *Podocarpus* (Fpd) and *Erica* forest (Fer) plots may have been partly caused by recurrent fire  
310 events (Hemp, 2005) leading to reduced SOC contents and higher C/N ratios (Saiz et al., 2015a). Further variations in soil  
311 δ<sup>13</sup>C values could also be related to the biochemical composition of the precursor biomass. For instance, herbaceous  
312 vegetation is pervasive at high elevations, and contains relatively low amounts of lignin – an organic compound  
313 characteristically depleted in <sup>13</sup>C (Benner et al., 1987). This may contribute to explain the higher δ<sup>13</sup>C values observed in  
314 plant and soil materials in alpine ecosystems dominated by *Helichrysum* vegetation, compared to forest ecosystems at lower  
315 elevations (Fig. 2).

316 Elevation also has a strong influence on the seasonal litterfall dynamics observed in Mt Kilimanjaro, and thus may have  
317 significant implications in the SOM cycling across the various ecosystems (Becker et al., 2015). These authors suggest that  
318 the large accumulation of particulate organic matter observed at the end of the dry season in low and mid altitude ecosystems  
319 may result in the increased mineralization of easily available substrates (Mganga and Kuzyakov, 2014) and nutrient leaching  
320 (Gütlein et al., 2018) during the following wet season. Agricultural practices such as the removal of biomass or ploughing  
321 deplete SOM, particularly in the intensively managed systems (i.e. maize, homegardens and coffee plantations), thus leading

Deleted:

Formatted: Highlight

Deleted: S2

Deleted: 200

Deleted: be a plausible

Deleted: explanation for

Moved down [2]: Agricultural practices such as the removal of biomass or ploughing deplete SOM, particularly in the intensively managed systems (i.e. homegardens and coffee plantations), thus leading to lower SOC contents and C/N ratios, and slightly higher soil δ<sup>13</sup>C values than those observed in semi-natural ecosystems at comparable elevations (e.g. lower montane forests; Fig. S2). Moreover, low-elevation ecosystems contained a variable mixture of C<sub>3</sub> and C<sub>4</sub> vegetation, which have been shown to have differential mineralization dynamics as demonstrated by incubation experiments (Wynn and Bird, 2007), and field-based research (Saiz et al., 2015a).

Deleted: Compared to high-elevation locations, the climatic conditions of low-elevation ecosystems are more favourable for the activities of SOM decomposers, as these sites are consistently warmer and drier than the characteristically cool and occasionally waterlogged high-altitude ecosystems (Borken and Matzner, 2009; Garten et al., 2009; Kirschbaum, 1995; Leirós et al., 1999).

Moved (insertion) [2]

352 to lower SOC contents and C/N ratios, and slightly higher soil  $\delta^{13}\text{C}$  values than those observed in semi-natural ecosystems at  
353 comparable elevations (e.g. lower montane forests; Fig. S3). Indeed, the relationship between  $\delta^{13}\text{C}$  enrichment factors and  
354 soil C/N ratios shown in Fig. 3 is quite informative regarding SOM dynamics. As previously mentioned, soil C/N ratios  
355 provide a good indication of SOM decomposition processes, typically showing comparatively low values in managed and  
356 disturbed systems. These correspond well with sites having large enrichment factors ( $< -1.25\text{‰}$ ; i.e. intensively managed  
357 and disturbed sites), which agree with the notion of altered SOM dynamics. Therefore, besides the systematic removal of  
358 plant biomass characteristic of agricultural systems, annual litterfall patterns may also explain the comparatively lower  
359 contents of C and N observed in the topsoils of intensively managed sites (Table 1; Figs. S3, S4). Moreover, low-elevation  
360 ecosystems contain a variable mixture of  $\text{C}_3$  and  $\text{C}_4$  vegetation, which have been shown to have differential mineralization  
361 dynamics as demonstrated by incubation experiments (Wynn and Bird, 2007), and field-based research (Saiz et al., 2015a).  
362 Our data show strong relationships between temperature and variables directly related to SOM dynamics such as soil  $\delta^{13}\text{C}$ ,  
363 C, N and C/N ratios (Table S1). These results agree well with recent findings by Becker and Kuzyakov (2018) who studied  
364 SOM decomposition dynamics at these very sites. An important finding revealed by that study is that of seasonal variation in  
365 temperature is a major controlling factor in litter decomposition. Their study shows that small seasonal variations in  
366 temperature observed at high elevation sites exert a strong effect on litter decomposition rates. Therefore, the authors argue  
367 that the projected increase in surface temperature may result in potentially large soil C losses at these sites due to the  
368 comparatively strong temperature sensitivity to decomposition that is commonly observed at low temperatures and at high  
369 elevations sites (Blagodatskaya et al., 2016).

Deleted: 2

370 Savannas and grasslands are subject to recurrent fire events, and thus the soils of these ecosystems may potentially contain  
371 significant amounts of fire-derived (pyrogenic) C (Saiz et al., 2015b). This can be partly demonstrated by the higher soil C/N  
372 ratios observed in these ecosystems compared to  $\text{C}_4$ -dominated agricultural systems protected from fire (e.g. maize  
373 plantations; Fig. S3d). Moreover, the  $\delta^{13}\text{C}$  values of soils in grasslands and savannas were lower than those of leaves, which  
374 may be due to the savanna isotope disequilibrium effect (SIDE) (Bird and Pousai, 1997; Saiz et al., 2015b). The latter  
375 concept explains the difference in C isotopic composition between the precursor vegetation and pyrogenic C compounds  
376 produced during the combustion of biomass. Saiz et al. (2015b) have demonstrated that savanna fires produce pyrogenic C  
377 that is relatively  $^{13}\text{C}$  depleted with respect to the precursor biomass. Furthermore, the combustion of  $\text{C}_4$  vegetation produces  
378 finer pyrogenic C particles than woody biomass, resulting in the preferential export of grass-derived pyrogenic particles from  
379 the site of burning, which further enhances the depletion of  $^{13}\text{C}$  in these soils (Saiz et al., 2018).

Deleted: S2d

#### 380 **4.2 Variation of $\delta^{15}\text{N}$ values along the elevational and land-use gradient**

383 The  $\delta^{15}\text{N}$  values of leaves, litter, and topsoil presented here (Fig. 4a) agree well with the range of data reported from earlier  
384 investigations in the same study region (Amundson et al., 2003; Zech et al., 2011), but with our study involving more  
385 ecosystems, replicate sites and a far larger spatial sampling domain. Overall, the  $\delta^{15}\text{N}$  values for montane tropical forest  
386 ecosystems in Mt. Kilimanjaro are considerably lower than the mean values reported for a broad variety of tropical lowland  
387 forests worldwide (soil values ranging from 3 to 14 ‰; de Freitas et al., 2015; Martinelli et al., 1999; Nardoto et al., 2014;  
388 Piccolo et al., 1996; Sotta et al., 2008). Rather, the  $\delta^{15}\text{N}$  values observed in the montane forests investigated are in the same  
389 range of temperate forest ecosystems reported in a comprehensive literature review by Martinelli et al. (1999). These authors  
390 argue that, compared to tropical lowland forests, the lower  $\delta^{15}\text{N}$  values of temperate and montane tropical forests result from  
391 their lower N availability and thus lower ecosystem N losses. However, this hypothesis may not completely hold for the  
392 montane forest ecosystems of our study, since Gütlein et al. (2018) reported elevated soil  $\text{NO}_3^-$  and DON concentrations at  
393 deep soil solution (80 cm) and significant nitrogen leaching rates of 10 - 15 kg N ha<sup>-1</sup> y<sup>-1</sup>. The relatively low  $\delta^{15}\text{N}$ -based  
394 enrichment factors observed in the lower montane, *Ocotea* and undisturbed *Podocarpus* forest (Fig. 4b) were probably due  
395 to the prevalence of biological di-nitrogen fixation (BNF) at these ecosystems. The assumption of significant BNF is  
396 supported by leaf  $\delta^{15}\text{N}$  values close to 0 ‰ (Fig. 4a) and is in line with previous works (Craine et al., 2015a; Nardoto et al.,  
397 2014; Robinson, 2001). Furthermore, sporadic measurements of N-compounds in rainfall and throughfall conducted at our  
398 forest sites showed substantial input of N via atmospheric deposition, which may be in the order of N leaching losses  
399 (unpublished results). This agrees well with findings from Bauters et al. (2018) reporting 18 kg N ha<sup>-1</sup> y<sup>-1</sup> N inputs via wet  
400 deposition into tropical forests of the Congo Basin, which are predominantly derived from biomass burning and long-range  
401 atmospheric transport. High N inputs into these forest ecosystems are likely to be in a similar range as N outputs (prevailed  
402 by leaching losses particularly where MAP is highest; Gütlein et al., 2018), and therefore, they would not translate to strong  
403 effects on ecosystem  $\delta^{15}\text{N}$  values. The significantly more negative enrichment factors observed in the disturbed *Podocarpus*  
404 and *Erica* forests (Fig. 4b) may be related to past fire events (Hemp, 2005; Zech et al., 2011). Burning of vegetation may  
405 cause losses of <sup>15</sup>N-depleted  $\text{NO}_x$  gas and N leachate, resulting in higher soil  $\delta^{15}\text{N}$  values, thus producing variations in  $\delta^{15}\text{N}$ -  
406 based enrichment factors (Zech et al., 2011).

407 Previous studies have shown that  $\delta^{15}\text{N}$  values generally increase with land-use intensification (Martinelli et al., 1999;  
408 Stevenson et al., 2010), which corresponds well with the more positive  $\delta^{15}\text{N}$  values observed in the intensively managed  
409 agricultural systems occurring at the mountain's foot slope (Fig. 4a). Indeed, agronomic practices such as fertilization,  
410 removal of plant material after harvest, or ploughing, are factors known to affect N turnover processes that strongly affect  
411  $\delta^{15}\text{N}$  values (Bedard-Haughn et al., 2003; Saiz et al., 2016). However, our values are in the lower range of published data for  
412 other land-use gradients (Aranibar et al., 2008; Eshetu and Högberg, 2000; Traoré et al., 2015), and may partly be the result  
413 of comparably low to moderate organic and inorganic N fertilization rates currently applied in the region (anecdotal evidence

Deleted: 3a

Deleted: 3b

Deleted: 3a

Deleted: 3b

Deleted: .

Deleted: 3a

420 gathered by the authors and SI. Additionally, the nitrogen isotopic signal of mineral fertilizers commonly used in the region  
421 is ~0 ‰ (Bateman and Kelly, 2007), and thus, it may not exert a significant additional bias on the interpretation of soil  $\delta^{15}\text{N}$   
422 values. However, the addition of manure ( $\delta^{15}\text{N}$  ~8 ‰) in Hom systems, albeit used in low quantities (Gütlein et al., 2018),  
423 may have well contributed to the high  $\delta^{15}\text{N}$  values observed in this ecosystem (Fig. 4). Also, we suggest that the use of  
424 pesticides may not pose a strong bias in our isotopic results since their use is limited to intensively managed sites, and the  
425 actual isotopic values of pesticides work in the opposite direction to the observed data (Fig. 4; SI).

426 Compared to other low-elevation managed stands such as homegardens and coffee plantations, the higher  $\delta^{15}\text{N}$ -based  
427 enrichment factors observed in maize fields and in grass-dominated ecosystems (grasslands and savannas) (Fig. 4b) may be  
428 related to both the organic inputs resultant from grazing activities and the influence of  $\text{C}_4$  vegetation. Both Aranibar et al.  
429 (2008) and Wang et al. (2010) have suggested that variations in  $\delta^{15}\text{N}$  values within a given ecosystem could be due to  $\text{C}_3$  and  
430  $\text{C}_4$  plants preferentially absorbing chemical forms of N with differing  $^{15}\text{N}$  abundances. Moreover, recurrent fires  
431 characteristic of tropical grasslands and savannas may have also influenced their comparatively high soil  $\delta^{15}\text{N}$ , causing the  
432 relatively high  $\delta^{15}\text{N}$ -based enrichment factors.

### 433 4.3 Factors controlling soil $\delta^{15}\text{N}$ along the elevational and land-use gradient

434 The strong controlling effects exerted by climatic and edaphic factors on soil  $\delta^{15}\text{N}$  values agree well with numerous previous  
435 works (Amundson et al., 2003; Conen et al., 2013; Eshetu and Högberg, 2000; Martinelli et al., 1999; Stevenson et al.,  
436 2010). The principal component analysis of factors controlling soil  $\delta^{15}\text{N}$  revealed a strong clustering between managed and  
437 semi-natural ecosystems (Fig. 5), which was also reflected in the multiple regression analysis and graphical representation  
438 depicting soil  $\delta^{15}\text{N}$  as a function of soil N concentration and MAT (Fig. 6). Semi-natural ecosystems were characterized by  
439 relatively low soil  $\delta^{15}\text{N}$  values, and occurred across a broad range of soil N contents in locations with low to medium MAT.  
440 By contrast, intensively managed ecosystems had higher soil  $\delta^{15}\text{N}$  values and corresponded to locations with low soil N  
441 contents and high MAT. The negative correlation of  $\delta^{15}\text{N}$  values with soil nitrogen content and the positive correlation with  
442 mean annual temperature suggest reduced mineralisation rates, and thus limited nitrogen availability, at least in high-  
443 elevation ecosystems.

444 The sharp contrast observed both in soil C/N ratios and  $\delta^{15}\text{N}$  values between managed and semi-natural ecosystems offers  
445 additional useful information about their potentially contrasting SOM dynamics (Fig. S4d). Intensively managed sites  
446 consistently showed low soil C/N ratios and high soil  $\delta^{15}\text{N}$  values, which may initially suggest a more open N cycle and  
447 potentially greater N losses as reported by Gerschlaier et al. (2016) for some of these ecosystems. This may due to C-  
448 limitation of heterotrophic microbial N retention under low C/N ratios (Butterbach-Bahl and Dannenmann, 2012). However,  
449 nitrate leaching is quite a relevant process that discriminates only slightly against  $^{15}\text{N}$  (Denk et al., 2017), which may

Deleted: 3b

Deleted: 4

Deleted: 5

Deleted: These ecosystems are characterized by having a more open N cycle, and thus higher soil  $\delta^{15}\text{N}$  values, than semi-natural and extensively managed systems (Conen et al., 2013; Gerschlaier et al., 2016; Saiz et al., 2016; Stevenson et al., 2010).

Deleted: S3d

Deleted: strongly

Deleted: is

462 confound the interpretation of soil  $\delta^{15}\text{N}$  values. Indeed, Gütlein et al. (2018) have recently shown that nitrate leaching may  
463 be quite significant in Mt Kilimanjaro's semi-natural forests. Therefore, at least in these ecosystems, claims about the nature  
464 of the N cycle (i.e. open/close) should not be made solely on the basis of soil  $\delta^{15}\text{N}$ .

465 Grass-dominated ecosystems (grasslands and savannas) were noticeably different to the intensively managed croplands, as  
466 demonstrated by the higher soil C/N ratios and lower soil  $\delta^{15}\text{N}$  of the former, which suggest a lower degree of decomposition  
467 of organic matter and potentially lower N turnover rates (Saiz et al., 2016). Within the intensively managed sites, the stands  
468 under maize cultivation show an interesting case of enhanced SOM dynamics. These sites are under an intensive  
469 management regime that involves the removal of aboveground vegetation after harvest. This fact combined with the faster  
470 decomposition rates reported for C<sub>4</sub>-derived SOM (Saiz et al., 2015a; 2016; Wynn and Bird, 2007) may invariably lead to  
471 their characteristically low SOC and N contents (Table 1; Figs. ~~S3~~, ~~S4~~). Furthermore, low soil C/N ratios have been reported  
472 to enhance gaseous losses in semi-arid systems, which leads to increased soil  $\delta^{15}\text{N}$  values (Aranibar et al., 2004) and may  
473 explain why maize stands showed the highest soil  $\delta^{15}\text{N}$  values of all the land uses studied.

474 Semi-natural ecosystems showed rather high soil C/N ratios and low soil  $\delta^{15}\text{N}$  values compared to managed sites (Fig. ~~S4d~~).  
475 The more humid and cooler conditions prevalent in forest ecosystems may limit decomposition processes, thereby  
476 contributing significantly to their higher SOM abundance (Table 1). A small variation range in soil  $\delta^{15}\text{N}$  values was also  
477 reported by Zech et al (2011) for semi-natural ecosystems (Foc and Fpo) when working along the same land-use and  
478 elevation gradient. Like us, these authors also observed a strong significant correlation of soil  $\delta^{15}\text{N}$  with MAT, but not with  
479 MAP (Table S1). Additionally, site-specific soil characteristics, and the structural composition of vegetation have a strong  
480 influence on ecosystem nutrient dynamics (Saiz et al., 2012; 2015a). Ecosystem disturbances (e.g. fire, selective logging,  
481 etc.) cause changes in vegetation cover that affect SOM cycling and may translate into variations in soil C/N ratios (Saiz et  
482 al., 2016). Both *Ocotea* and *Podocarpus* forests contain disturbed (Fod, Fpd) and undisturbed stands (Foc, Fpo), though only  
483 the *Podocarpus* ecosystems allow for a general overview of disturbance impacts on SOM-related properties. While changes  
484 in the isotopic composition of C and N were not significant, soil C/N ratios were heavily influenced by disturbance (Fig. ~~S4~~).

485 Compared to non-disturbed sites, the lower C and N contents observed in the soil of disturbed ecosystems indicate reduced  
486 OM inputs to the soil and/or enhanced decomposition of SOM (Table 1). The higher soil C/N ratios observed in the  
487 *Podocarpus* disturbed and *Erica* forests may well be the result of fire, which may preferentially promote N losses while  
488 accruing relatively recalcitrant C forms (i.e. pyrogenic C). Woody biomass combustion produces pyrogenic C that  
489 accumulates preferentially close to the site of production (Saiz et al., 2018), thus likely contributing to the higher soil C/N  
490 ratios observed at these disturbed ecosystems. The lowest soil C/N ratios among all semi-natural ecosystems were observed  
491 at the alpine *Helichrysum* sites, which may relate to their characteristically sparse vegetation and extremely low MAT.

Deleted: g

Deleted: S2

Deleted: S3

Deleted: S3d

Deleted:

Deleted: S3

498 Under such circumstances soil development, biomass inputs, decomposition processes, and thus, soil N turnover may be  
499 strongly limited, as it was confirmed by a recent study conducted at one of these sites (Gütlein et al., 2017).

Formatted: Font:

## 500 **5 Conclusions**

501 The variations in  $\delta^{13}\text{C}$  and  $\delta^{15}\text{N}$  values combined with interpretation of other indices such as  $\delta^{13}\text{C}$ - and  $\delta^{15}\text{N}$ -based  
502 enrichment factors and soil C/N ratios, enabled a qualitative characterisation of regional differences in C and N dynamics as  
503 affected by vegetation characteristics, environmental conditions, and management activities.

504 Our data show that SOM contents are higher in cold and wet high-elevation ecosystems than at low-elevation managed sites.

Deleted: N cycles are tighter and

505 Management practices such as tillage, harvest, and vegetation burning promote the loss of OM, with SOM decomposition  
506 being further enhanced by the warm and moderately wet conditions of the mountain's foot slope. Based on our results, we  
507 suggest that besides management, increasing temperatures in a changing climate may promote C and N losses, thus altering  
508 the otherwise stable SOM dynamics of Mt. Kilimanjaro's forest ecosystems. Moreover, the current situation of low N inputs  
509 in managed systems of sub-Saharan Africa is likely to change, since national efforts aim to increase fertilizer use are  
510 currently <10% of recommended rates (Hickman et al., 2014). Therefore, our data may also be valuable as a generic  
511 reference for low-elevation tropical agrosystems managed under low N inputs, while it may also allow the monitoring of  
512 expected changes in agricultural management, and associated impacts on ecosystem N cycle through the study of the  
513 variation in  $\delta^{15}\text{N}$  values.

Deleted: nitrogen

514 In addition to climatic and edaphic factors,  $\delta^{15}\text{N}$  values of plant and soil material can largely depend on both the amount and  
515  $\delta^{15}\text{N}$  signal of atmospheric deposition and BNF, which highlights the importance of conducting additional measurements of  
516 site specific N cycling, when comparing ecosystem  $\delta^{15}\text{N}$  values across different biomes and regions. The combination of  
517 qualitative isotope natural abundance studies at a large number of sites (this study) with more elaborated quantitative process  
518 studies using enriched isotope labelling and N losses on a lower number of selected sites represent an ideal approach to  
519 characterize ecosystem C and N cycling of the larger Mt. Kilimanjaro region with its diverse ecosystems, climate, and  
520 management.

## 521 **Author contribution**

522 FG contributed to design, performed the study, and co-wrote the paper; GS contributed to analyses and co-wrote the paper;  
523 DSC and MK provided plant samples and contributed to writing; MD contributed to writing; and RK designed the study and  
524 contributed to analyses and writing.

## 525 **Competing Interests**

528 The authors declare no competing interests.

## 529 Acknowledgments

530 This study was funded by the German Research Foundation (DFG: KI 1431/1-1 and KI 1431/1-2) within the Research-Unit  
531 1246 (KiLi) and supported by the Tanzanian Commission for Science and Technology (COSTECH), the Tanzania Wildlife  
532 Research Institute (TAWIRI) and the Mount Kilimanjaro National Park (KINAPA). In addition, the authors thank Dr.  
533 Andreas Hemp for selection and preparation of the research plots, Prof. Dr. Bernd Huwe for correction of soil texture data,  
534 as well as all local helpers in Tanzania, and the assistants in the laboratory of IMK-IFU in Germany. Technical support by  
535 the Center of Stable Isotopes of KIT/IMK-IFU is gratefully acknowledged. Further thanks go to the following persons from  
536 the KiLi project: Dr. Tim Appelhans and Prof. Dr. Thomas Nauss, Jie Zhang, Dr. Gemma Rutten, and Dr. Andreas Hemp for  
537 providing georeferenced points underlying the GeoTIFF in Figure 1 b). [We also thank three anonymous reviewers and](#)  
538 [Jonathan Wynn for insightful comments on the MS.](#)

## 539 References

- 540 Abaker, W.E., Berninger, F., Saiz, G., Braojos, V., Starr, M.: Contribution of *Acacia senegal* to biomass and soil carbon in  
541 plantations of varying age in Sudan. *For. Ecol. Manag.* 368, 71–80. doi.org/10.1016/j.foreco.2016.03.003, 2016.
- 542 Abaker, W.E., Berninger, F., Saiz, G., Purnanen, J., Starr, M.: Linkages between soil carbon, soil fertility and nitrogen  
543 fixation in *Acacia senegal* plantations of varying age in Sudan. *PeerJ* 6:e5232. doi:10.7717/peerj.5232, 2018.
- 544 [Acton, P., Fox, J., Campbell, E., Rowe, H., & Wilkinson, M. \(2013\). Carbon isotopes for estimating soil decomposition and](#)  
545 [physical mixing in well-drained forest soils. \*Journal of Geophysical Research: Biogeosciences\*, 118\(4\), 1532-1545.](#)
- 546 Amundson, R., Austin, A.T., Schuur, E.A.G., Yoo, K., Matzek, V., Kendall, C., Uebersax, A., Brenner, D., Baisden, W.T.:  
547 Global patterns of the isotopic composition of soil and plant nitrogen. *Glob. Biogeochem. Cycles* 17, 1031, 2003.
- 548 Appelhans, T., Mwangomo, E., Otte, I., Detsch, F., Nauss, T., Hemp, A.: Eco-meteorological characteristics of the southern  
549 slopes of Kilimanjaro, Tanzania. *Int. J. Climatol.* 36, 3245–3258. doi.org/10.1002/joc.4552, 2016.
- 550 Aranibar, J.N., Anderson, I.C., Epstein, H.E., Feral, C.J.W., Swap, R.J., Ramontsho, J., Macko, S.A.: Nitrogen isotope  
551 composition of soils, C3 and C4 plants along land use gradients in southern Africa. *J. Arid Environ.* 72, 326–337.  
552 doi.org/10.1016/j.jaridenv.2007.06.007, 2008.
- 553 Aranibar, J.N., Otter, L., Macko, S.A., Feral, C.J., Epstein, H.E., Dowty, P.R., Eckardt, F., Shugart, H.H., Swap, R.J.:  
554 Nitrogen cycling in the soil–plant system along a precipitation gradient in the Kalahari sands. *Global Change Biology* 10,  
555 359-373. doi.org/10.1111/j.1365-2486.2003.00698.x, 2004.



556 Bai, E., Houlton, B.Z., Wang, Y.P.: Isotopic identification of nitrogen hotspots across natural terrestrial ecosystems.  
557 *Biogeosciences* 9, 3287–3304. doi.org/10.5194/bg-9-3287-2012, 2012

558 [Bateman, A. S., and Kelly, S. D. \(2007\). Fertilizer nitrogen isotope signatures. \*Isotopes in environmental and health\*](#)  
559 [studies, 43\(3\), 237-247.](#)

560 Bauters, M., Drake, T.W., Verbeeck, H., Bodé, S., Hervé-Fernández, P., Zito, P., Podgorski, D.C., Boyemba, F., Makelele,  
561 I., Ntaboba, L.C., Spencer, R.G.M., Boeckx, P.: High fire-derived nitrogen deposition on central African forests. *Proc.*  
562 *Natl. Acad. Sci.* 201714597. doi.org/10.1073/pnas.1714597115, 2018.

563 [Becker, J., Pabst, H., Mnyonga, J., and Kuzyakov, Y. \(2015\). Annual litter fall dynamics and nutrient deposition depending](#)  
564 [on elevation and land use at Mt. Kilimanjaro. \*Biogeosciences\*, 12, 5635–5646](#)

565 [Becker, J. N., and Kuzyakov, Y. \(2018\). Teatime on Mount Kilimanjaro: Assessing climate and land-use effects on litter](#)  
566 [decomposition and stabilization using the Tea Bag Index. \*Land Degradation & Development\*, 29\(8\), 2321-2329](#)

567 Bedard-Haughn, A, van Groenigen, J.W., van Kessel, C.: Tracing 15N through landscapes: potential uses and precautions. *J*  
568 *Hydrol* 272:175–190. doi: 10.1016/S0022-1694(02)00263-9, 2003.

569 Benner, R., Fogel, M.L., Sprague, E.K., Hodson, R.E.: Depletion of 13C in lignin and its implications for stable carbon  
570 isotope studies. *Nature* 329, 708–710. doi.org/10.1038/329708a0, 1987.

571 Bird, M.I., Haberle, S.G., Chivas, A.R.: Effect of altitude on the carbon-isotope composition of forest and grassland soils  
572 from Papua New Guinea. *Glob. Biogeochem. Cycles* 8, 13–22. doi.org/10.1029/93GB03487, 1994.

573 Bird, M.I., Pousai, P.: Variations of  $\delta^{13}\text{C}$  in the surface soil organic carbon pool. *Glob. Biogeochem. Cycles* 11, 313–322.  
574 doi.org/10.1029/97GB01197, 1997.

575 Bird, M.I., Veenendaal, E.M., Lloyd, J.J.: Soil carbon inventories and  $\delta^{13}\text{C}$  along a moisture gradient in Botswana. *Glob.*  
576 *Change Biol.* 10, 342–349. doi.org/10.1046/j.1365-2486.2003.00695.x, 2004.

577 [Blagodatskaya, E., Blagodatsky, S., Khomyakov, N., Myachina, O., & Kuzyakov, Y. \(2016\). Temperature sensitivity and](#)  
578 [enzymatic mechanisms of soil organic matter decomposition along an altitudinal gradient on Mount Kilimanjaro.](#)  
579 [\*Scientific Reports\*, 6, 22240.](#)

580 Booth, M.S., Stark, J.M., Rastetter, E.: Controls on Nitrogen Cycling in Terrestrial Ecosystems: A Synthetic Analysis of  
581 Literature Data. *Ecol. Monogr.* 75, 139–157. doi.org/10.2307/4539091, 2005.

582 Borken, W., Matzner, E.: Reappraisal of drying and wetting effects on C and N mineralization and fluxes in soils. *Glob.*  
583 *Change Biol.* 15, 808–824. doi.org/10.1111/j.1365-2486.2008.01681.x, 2009.

584 Butterbach-Bahl, K., Dannenmann, M.: Soil Carbon and Nitrogen Interactions and Biosphere-Atmosphere Exchange of  
585 Nitrous Oxide and Methane. In: Lal R, Lorenz K, Hüttl RF, et al. (eds) *Recarbonization of the Biosphere*. Springer  
586 Netherlands, pp 429–443, 2012.

587 Cernusak, L.A., Ubierna, N., Winter, K., Holtum, J.A.M., Marshall, J.D., Farquhar, G.D.: Environmental and physiological  
588 determinants of carbon isotope discrimination in terrestrial plants. *New Phytol.* 200, 950–965.  
589 doi.org/10.1111/nph.12423, 2013.

590 Conen, F., Yakutin, M.V., Carle, N., Alewell, C.:  $\delta^{15}\text{N}$  natural abundance may directly disclose perturbed soil when related  
591 to C:N ratio. *Rapid Commun. Mass Spectrom.* 27, 1101–1104. doi.org/10.1002/rcm.6552, 2013.

592 Craine, J.M., Brookshire, E.N.J., Cramer, M.D., Hasselquist, N.J., Koba, K., Marin-Spiotta, E., Wang, L.: Ecological  
593 interpretations of nitrogen isotope ratios of terrestrial plants and soils. *Plant Soil* 396, 1–26. doi.org/10.1007/s11104-015-  
594 2542-1, 2015a.

595 Craine, J.M., Elmore, A.J., Wang, L., Augusto, L., Baisden, W.T., Brookshire, E.N.J., Cramer, M.D., Hasselquist, N.J.,  
596 Hobbie, E.A., Kahmen, A., Koba, K., Kranabetter, J.M., Mack, M.C., Marin-Spiotta, E., Mayor, J.R., McLauchlan, K.K.,  
597 Michelsen, A., Nardoto, G.B., Oliveira, R.S., Perakis, S.S., Peri, P.L., Quesada, C.A., Richter, A., Schipper, L.A.,  
598 Stevenson, B.A., Turner, B.L., Viani, R.A.G., Wanek, W., Zeller, B.: Convergence of soil nitrogen isotopes across global  
599 climate gradients. *Sci. Rep.* 5. doi.org/10.1038/srep08280, 2015b.

600 Dawson, T.E., Mambelli, S., Plamboeck, A.H., Templer, P.H., Tu, K.P.: Stable Isotopes in Plant Ecology. *Annu. Rev. Ecol.*  
601 *Syst.* 33, 507–559. doi.org/10.1146/annurev.ecolsys.33.020602.095451, 2002.

602 de Freitas, A.D.S., de Sá Barretto Sampaio, E.V., de Souza Ramos, A.P., de Vasconcellos Barbosa, M.R., Lyra, R.P., Araújo,  
603 E.L.: Nitrogen isotopic patterns in tropical forests along a rainfall gradient in Northeast Brazil. *Plant Soil* 391, 109–122.  
604 doi.org/10.1007/s11104-015-2417-5, 2015.

605 Denk, T.R.A., Mohn, J., Decock, C., Lewicka-Szczebak, D., Harris, E., Butterbach-Bahl, K., Kiese, R., Wolf, B.: The  
606 nitrogen cycle: A review of isotope effects and isotope modeling approaches. *Soil Biol. Biochem.* 105, 121–137.  
607 doi.org/10.1016/j.soilbio.2016.11.015, 2017.

608 Duane, W., Pepin, N., Losleben, M., Hardy, D.: General Characteristics of Temperature and Humidity Variability on  
609 Kilimanjaro, Tanzania. *Arct. Antarct. Alp. Res.* 40, 323–334, 2008.

610 Ensslin, A., Rutten, G., Pommer, U., Zimmermann, R., Hemp, A. and Fischer, M.: Effects of elevation and land use on the  
611 biomass of trees, shrubs and herbs at Mount Kilimanjaro, *Ecosphere*, 6(3), 1–15, doi:10.1890/ES14-00492.1, 2015.

612 [Eshetu, Z., Högberg, P.: Effects of land use on  \$^{15}\text{N}\$  natural abundance of soils in Ethiopian highlands. \*Plant Soil\* 222, 109–](#)  
613 [117, 2000.](#)

614 FAO, JRC: Global forest land-use change 1990–2005, in: Lindquist, E.J., D’Annunzio, R., Gerrand, A., MacDicken, K.,  
615 Achard, F., Beuchle, R., Brink, A., Eva, H.D., Mayaux, P., San-Miguel-Ayanz, J., Stibig, H.-J. (Eds.), *FAO Forestry*  
616 *Paper No. 16.* Food and Agriculture Organization of the United Nations and European Commission Joint Research Centre,  
617 Rome, FAO, 2012.

**Deleted:** -

**Moved down [1]:** Eshetu, Z., Högberg, P.: Effects of land use on  $^{15}\text{N}$  natural abundance of soils in Ethiopian highlands. *Plant Soil* 222, 109–117, 2000. -

**Deleted:** -

**Moved (insertion) [1]**

624 Farquhar, G.D., Caemmerer, S. von, Berry, J.A.: A biochemical model of photosynthetic CO<sub>2</sub> assimilation in leaves of C3  
625 species. *Planta* 149, 78–90. doi.org/10.1007/BF00386231, 1980.

626 Farquhar, G.D., Sharkey, T.D.: Stomatal Conductance and Photosynthesis. *Annu. Rev. Plant Physiol.* 33, 317–345.  
627 doi.org/10.1146/annurev.pp.33.060182.001533, 1982.

628 Garten, C.T., Classen, A.T., Norby, R.J.: Soil moisture surpasses elevated CO<sub>2</sub> and temperature as a control on soil carbon  
629 dynamics in a multi-factor climate change experiment. *Plant Soil* 319, 85–94. doi.org/10.1007/s11104-008-9851-6, 2009.

630 Garten, C.T., Hanson, P.J., Todd, D.E., Lu, B.B., Brice, D.J.: Natural <sup>15</sup>N-and <sup>13</sup>C-abundance as indicators of forest  
631 nitrogen status and soil carbon dynamics. *Stable Isot. Ecol. Environ. Sci.* 61, 2008

632 Gerschlauser, F., Dannenmann, M., Kühnel, A., Meier, R., Kolar, A., Butterbach-Bahl, K., Kiese, R.: Gross Nitrogen  
633 Turnover of Natural and Managed Tropical Ecosystems at Mt. Kilimanjaro, Tanzania. *Ecosystems* 1–18.  
634 doi.org/10.1007/s10021-016-0001-3, 2016.

635 Gruber, N., Galloway, J.N.: An Earth-system perspective of the global nitrogen cycle. *Nature* 451, 293–296.  
636 doi.org/10.1038/nature06592, 2008.

637 Gütlein, A., Gerschlauser, F., Kikoti, I., Kiese, R.: Impacts of climate and land use on N<sub>2</sub>O and CH<sub>4</sub> fluxes from tropical  
638 ecosystems in the Mt. Kilimanjaro region, Tanzania. *Glob. Change Biol.* 24, 1239–1255. doi.org/10.1111/gcb.13944,  
639 2018.

640 Gütlein, A., Zistl-Schlingmann, M., Becker, J.N., Cornejo, N.S., Detsch, F., Dannenmann, M., Appelhans, T., Hertel, D.,  
641 Kuzyakov, Y., Kiese, R.: Nitrogen turnover and greenhouse gas emissions in a tropical alpine ecosystem, Mt.  
642 Kilimanjaro, Tanzania. *Plant Soil* 411, 243–259. doi.org/10.1007/s11104-016-3029-4, 2017.

643 Hedin, L.O., Brookshire, E.N.J., Menge, D.N.L., Barron, A.R.: The Nitrogen Paradox in Tropical Forest Ecosystems. *Annu.*  
644 *Rev. Ecol. Evol. Syst.* 40, 613–635. doi.org/10.1146/annurev.ecolsys.37.091305.110246, 2009.

645 Hemp, A.: Climate change-driven forest fires marginalize the impact of ice cap wasting on Kilimanjaro. *Glob. Change Biol.*  
646 11, 1013–1023. doi.org/10.1111/j.1365-2486.2005.00968.x, 2005.

647 Hickman, J.E., Palm, C.A., Mutuo, P., Melillo, J.M., Tang, J.: Nitrous oxide (N<sub>2</sub>O) emissions in response to increasing  
648 fertilizer addition in maize (*Zea mays* L.) agriculture in western Kenya. *Nutr. Cycl. Agroecosystems* 100, 177–187.  
649 doi.org/10.1007/s10705-014-9636-7, 2014.

650 Högberg, P.: <sup>15</sup>N natural abundance in soil-plant systems. *Tansley Review No. 95. New Phytol.* 137, 179–203.  
651 doi.org/10.1046/j.1469-8137.1997.00808.x, 1997.

652 Houlton, B.Z., Bai, E.: Imprint of denitrifying bacteria on the global terrestrial biosphere. *Proc. Natl. Acad. Sci.* 106, 21713–  
653 21716. doi.org/10.1073/pnas.0912111106, 2009.

654 Kirschbaum, M.U.F.: The temperature dependence of soil organic matter decomposition, and the effect of global warming  
655 on soil organic C storage. *Soil Biol. Biochem.* 27, 753–760. doi.org/10.1016/0038-0717(94)00242-S, 1995.

656 Kohn, M.J. Carbon isotope compositions of terrestrial C<sub>3</sub> plants as indicators of (paleo)ecology and (paleo)climate. *Proc.*  
657 *Natl. Acad. Sci.* 107, 19691–19695. doi.org/10.1073/pnas.1004933107, 2010.

658 Körner, C., Farquhar, G.D., Wong, S.C.: Carbon Isotope Discrimination by Plants Follows Latitudinal and Altitudinal  
659 Trends. *Oecologia* 88, 30–40, 1991.

660 Leirós, M.C., Trasar-Cepeda, C., Seoane, S., Gil-Sotres, F.: Dependence of mineralization of soil organic matter on  
661 temperature and moisture. *Soil Biol. Biochem.* 31, 327–335. doi.org/10.1016/S0038-0717(98)00129-1, 1999.

662 Lewis, S.L., Lloyd, J., Sitch, S., Mitchard, E.T.A., Laurance, W.F.: Changing Ecology of Tropical Forests: Evidence and  
663 Drivers. *Annu. Rev. Ecol. Evol. Syst.* 40, 529–549. doi.org/10.1146/annurev.ecolsys.39.110707.173345, 2009.

664 Ma, J.-Y., Sun, W., Liu, X.-N., Chen, F.-H.: Variation in the Stable Carbon and Nitrogen Isotope Composition of Plants and  
665 Soil along a Precipitation Gradient in Northern China. *PLOS ONE* 7, e51894. doi.org/10.1371/journal.pone.0051894,  
666 2012.

667 Majule, A.E.: Impacts of Land Use/Land Cover Changes on Soil Degradation and Biodiversity on the Slopes of Mount  
668 Kilimanjaro, Tanzania. LUCID Project, International Livestock Research Institute, 2003.

669 Mariotti, A., Germon, J.C., Hubert, P., Kaiser, P., Letolle, R., Tardieux, A., Tardieux, P.: Experimental determination of  
670 nitrogen kinetic isotope fractionation: some principles; illustration for the denitrification and nitrification processes. *Plant*  
671 *Soil* 62, 413–430, 1981.

672 Martinelli, L.A., Piccolo, M.C., Townsend, A.R., Vitousek, P.M., Cuevas, E., McDowell, W., Robertson, G.P., Santos, O.C.,  
673 Treseder, K.: Nitrogen stable isotopic composition of leaves and soil: Tropical versus temperate forests. *Biogeochemistry*  
674 46, 45–65. doi.org/10.1007/BF01007573, 1999.

675 [Mganga, K. Z., and Kuz'yakov, Y. \(2014\). Glucose decomposition and its incorporation into soil microbial biomass](#)  
676 [depending on land use in Mt. Kilimanjaro ecosystems. \*European Journal of Soil Biology\*, 62, 74–82](#)

677 Michener, R.H., Lajtha, K. (Eds.): Stable isotopes in ecology and environmental science, 2nd ed. ed, Ecological methods and  
678 concepts series. Blackwell Pub, Malden, MA., 2007.

679 Nardoto, G.B., Quesada, C.A., Patiño, S., Saiz, G., Baker, T.R., Schwarz, M., Schrodt, F., Feldpausch, T.R., Domingues,  
680 T.F., Marimon, B.S., Junior, B.-H.M., Vieira, I.C.G., Silveira, M., Bird, M.I., Phillips, O.L., Lloyd, J., Martinelli, L.A.:  
681 Basin-wide variations in Amazon forest nitrogen-cycling characteristics as inferred from plant and soil <sup>15</sup>N:<sup>14</sup>N  
682 measurements. *Plant Ecol. Divers.* 7, 173–187. doi.org/10.1080/17550874.2013.807524, 2014.

683 Ometto, J.P.H.B., Ehleringer, J.R., Domingues, T.F., Berry, J.A., Ishida, F.Y., Mazzi, E., Higuchi, N., Flanagan, L.B.,  
684 Nardoto, G.B., Martinelli, L.A.: The stable carbon and nitrogen isotopic composition of vegetation in tropical forests of  
685 the Amazon Basin, Brazil. *Biogeochemistry* 79, 251–274. doi.org/10.1007/s10533-006-9008-8, 2006.

686 Ortiz, C., Vázquez, E., Rubio, A., Benito, M., Schindlbacher, A., Jandl, R., Butterbach-Bahl, K., Díaz-Pinés, E.: Soil organic  
687 matter dynamics after afforestation of mountain grasslands in both a Mediterranean and a temperate climate.  
688 *Biogeochemistry* 131, 267–280. doi.org/10.1007/s10533-016-0278-5, 2016.

689 Pan, Y., Birdsey, R.A., Fang, J., Houghton, R., Kauppi, P.E., Kurz, W.A., Phillips, O.L., Shvidenko, A., Lewis, S.L.,  
690 Canadell, J.G., Ciais, P., Jackson, R.B., Pacala, S.W., McGuire, A.D., Piao, S., Rautiainen, A., Sitch, S., Hayes, D.: A  
691 Large and Persistent Carbon Sink in the World’s Forests. *Science* 333, 988–993. doi.org/10.1126/science.1201609, 2011.

692 Panettieri, M., Rumpel, C., Dignac, M. F., & Chabbi, A.: Does grassland introduction into cropping cycles affect carbon  
693 dynamics through changes of allocation of soil organic matter within aggregate fractions?. *Science of the Total*  
694 *Environment* 576, 251-263, 2017.

695 Pardo, L.H., Nadelhoffer, K.J.: Using Nitrogen Isotope Ratios to Assess Terrestrial Ecosystems at Regional and Global  
696 Scales, in: West, J.B., Bowen, G.J., Dawson, T.E., Tu, K.P. (Eds.), *Isoscapes*. Springer Netherlands, Dordrecht, pp. 221–  
697 249, 2010.

698 Peterson, B.J., Fry, B.: Stable Isotopes in Ecosystem Studies. *Annu. Rev. Ecol. Syst.* 18, 293–320.  
699 doi.org/10.1146/annurev.es.18.110187.001453, 1987.

700 Piccolo, M.C., Neill, C., Melillo, J.M., Cerri, C.C., Steudler, P.A.: <sup>15</sup>N natural abundance in forest and pasture soils of the  
701 Brazilian Amazon Basin. *Plant Soil* 182, 249–258. doi.org/10.1007/BF00029056, 1996.

702 R Core Team: R: A language and environment for statistical computing. R Foundation for Statistical Computing, Vienna,  
703 Austria, 2015.

704 Robinson, D.:  $\delta^{15}\text{N}$  as an integrator of the nitrogen cycle. *Trends Ecol. Evol.* 16, 153–162. doi.org/10.1016/S0169-  
705 5347(00)02098-X, 2001.

706 [Saiz, G., and Albrecht, A. \(2016\). Methods for smallholder quantification of soil carbon stocks and stock changes. In:](#)  
707 [Rosenstock TS, Rufino MC, Butterbach-Bahl K, Wollenberg E, Richards M \(eds\) \*Measurement methods Standard\*](#)  
708 [Assessment Of Agricultural Mitigation Potential And Livelihoods \(SAMPLES\). ISBN 978-3-319-29792-7. CGIAR](#)  
709 [Research Program on Climate Change, Agriculture and Food Security. pp 135-162.](#)

710 Saiz, G., Bird, M., Wurster, C., Quesada, C.A., Ascough, P., Domingues, T., Schrodt, F., Schwarz, M., Feldpausch, T.R.,  
711 Veenendaal, E., Djagbletey, G., Jacobsen, G., Hien, F., Compaore, H., Diallo, A., Lloyd, J.: The influence of C3 and C4  
712 vegetation on soil organic matter dynamics in contrasting semi-natural tropical ecosystems. *Biogeosciences* 12, 5041–  
713 5059. doi.org/10.5194/bg-12-5041-2015, 2015a.

714 Saiz, G., Bird, M., Domingues, T., Schrodt, F., Schwarz, M., Feldpausch, T., Veenendaal, E., Djagbletey, G., Hien, F.,  
715 Compaore, H., Diallo, A., Lloyd, J.: Variation in soil carbon stocks and their determinants across a precipitation gradient  
716 in West Africa. *Global Change Biology* 18, 1670-1683. doi:10.1111/j.1365-2486.2012.02657.x, 2012.

717 Saiz, G., Goodrick, I., Wurster, C., Nelson, P.N., Wynn, J., Bird, M.: Preferential Production and Transport of Grass-Derived  
718 Pyrogenic Carbon in NE-Australian Savanna Ecosystems. *Frontiers in Earth Science* 5,115.  
719 doi:10.3389/feart.2017.00115, 2018.

720 Saiz, G., Wandera, F.M., Pelster, D.E., Ngetich, W., Okalebo, J.R., Rufino, M.C., Butterbach-Bahl, K.: Long-term  
721 assessment of soil and water conservation measures (Fanya-juu terraces) on soil organic matter in South Eastern Kenya.  
722 *Geoderma* 274, 1–9. doi.org/10.1016/j.geoderma.2016.03.022, 2016.

723 Saiz, G., Wynn, J.G., Wurster, C.M., Goodrick, I., Nelson, P.N., Bird, M.I.: Pyrogenic carbon from tropical savanna burning:  
724 production and stable isotope composition. *Biogeosciences* 12, 1849–1863. doi.org/10.5194/bg-12-1849-2015, 2015b.

725 Schellenberger Costa, D., Gerschlaue, F., Pabst, H., Kühnel, A., Huwe, B., Kiese, R., Kuzyakov, Y., Kleyer, M. and Kühn,  
726 I.: Community-weighted means and functional dispersion of plant functional traits along environmental gradients on  
727 Mount Kilimanjaro. *J. Veg. Sci.*, 28(4), 684–695, doi:10.1111/jvs.12542, 2017.

728 Smith, P., Clark, H., Dong, H., Elsidig, E.A., Haberl, H., Harper, R., House, J., Jafari, M., Masera, O., Mbow, C.,  
729 Ravindranath, N.H., Rice, C.W., Roble do Abad, C., Romanovskaya, A., Sperling, F., Tubiello, F.: Chapter 11 -  
730 Agriculture, forestry and other land use (AFOLU), in: *Climate Change 2014: Mitigation of Climate Change. IPCC*  
731 *Working Group III Contribution to AR5. Cambridge University Press*, 2014.

732 Soini, E.: Land use change patterns and livelihood dynamics on the slopes of Mt. Kilimanjaro, Tanzania, *Agric. Syst.*, 85(3),  
733 306–323, doi:10.1016/j.agsy.2005.06.013, 2005.

734 Sotta, E.D., Corre, M.D., Veldkamp, E.: Differing N status and N retention processes of soils under old-growth lowland  
735 forest in Eastern Amazonia, Caxiuanã, Brazil. *Soil Biol. Biochem.* 40, 740–750. doi.org/10.1016/j.soilbio.2007.10.009,  
736 2008.

737 Stevenson, B.A., Parfitt, R.L., Schipper, L.A., Baisden, W.T., Mudge, P.: Relationship between soil  $\delta^{15}\text{N}$ , C/N and N losses  
738 across land uses in New Zealand. *Agric. Ecosyst. Environ.* 139, 736–741. doi.org/10.1016/j.agee.2010.10.020, 2010.

739 Swap, R.J., Aranibar, J.N., Dowty, P.R., Gilhooly, W.P., Macko, S.A.: Natural abundance of  $^{13}\text{C}$  and  $^{15}\text{N}$  in  $\text{C}_3$  and  $\text{C}_4$   
740 vegetation of southern Africa: patterns and implications. *Global Change Biology* 10(3), 350-358. doi.org/10.1111/j.1365-  
741 2486.2003.00702.x, 2004.

742 Tieszen, L.L., Senyimba, M.M., Imbamba, S.K., Troughton, J.H.: The distribution of  $\text{C}_3$  and  $\text{C}_4$  grasses and carbon isotope  
743 discrimination along an altitudinal and moisture gradient in Kenya. *Oecologia* 37, 337–350.  
744 doi.org/10.1007/BF00347910, 1979.

Deleted: -

746 Townsend, A.R., Cleveland, C.C., Houlton, B.Z., Alden, C.B., White, J.W.: Multi-element regulation of the tropical forest  
747 carbon cycle. *Front. Ecol. Environ.* 9, 9–17. doi.org/10.1890/100047, 2011.

748 Traoré, S., Ouattara, K., Ilstedt, U., Schmidt, M., Thiombiano, A., Malmer, A., Nyberg, G.: Effect of land degradation on  
749 carbon and nitrogen pools in two soil types of a semi-arid landscape in West Africa. *Geoderma* 241–242, 330–338.  
750 doi.org/10.1016/j.geoderma.2014.11.027, 2015.

751 van der Merwe, N.J., Medina, E.: Photosynthesis and  $^{13}\text{C}/^{12}\text{C}$  ratios in Amazonian rain forests. *Geochim. Cosmochim. Acta*  
752 53, 1091–1094. doi.org/10.1016/0016-7037(89)90213-5, 1989.

753 van Reeuwijk, L. (Ed.): Procedures for Soil Analysis 9, in: Technical Paper. International Soil Reference and Information  
754 Centre, Wageningen, 2002.

755 Vitousek, P.M.: Litterfall, Nutrient Cycling, and Nutrient Limitation in Tropical Forests. *Ecology* 65, 285–298.  
756 doi.org/10.2307/1939481, 1984.

757 Wang, L., D’Odorico, P., Ries, L., Macko, S.A.: Patterns and implications of plant-soil  $[\delta^{13}\text{C}]$  and  $[\delta^{15}\text{N}]$  values in  
758 African savanna ecosystems. *Quat. Res.* 73, 77–83. doi.org/10.1016/j.yqres.2008.11.004, 2010.

759 [Wang, C., Houlton, B. Z., Liu, D., Hou, J., Cheng, W., & Bai, E. \(2018\). Stable isotopic constraints on global soil organic](#)  
760 [carbon turnover. \*Biogeosciences\*, 15\(4\), 987-995](#)

761 Wynn, J.G., Bird, M.I.:  $\text{C}_4$ -derived soil organic carbon decomposes faster than its  $\text{C}_3$  counterpart in mixed  $\text{C}_3/\text{C}_4$  soils.  
762 *Glob. Change Biol.* 13, 2206–2217. doi.org/10.1111/j.1365-2486.2007.01435.x, 2007.

763 Zaehle, S.: Terrestrial nitrogen–carbon cycle interactions at the global scale. *Philos. Trans. R. Soc. B Biol. Sci.* 368,  
764 20130125. doi.org/10.1098/rstb.2013.0125, 2013.

765 Zech, M., Bimüller, C., Hemp, A., Samimi, C., Broesike, C., Hörold, C., Zech, W.: Human and climate impact on  $^{15}\text{N}$   
766 natural abundance of plants and soils in high-mountain ecosystems: a short review and two examples from the Eastern  
767 Pamirs and Mt. Kilimanjaro. *Isotopes Environ. Health Stud.* 47, 286–296. doi.org/10.1080/10256016.2011.596277, 2011.

768 Zhou, Y., Fan, J., Zhang, W., Harris, W., Zhong, H., Hu, Z., Song, L.: Factors influencing altitudinal patterns of  $\text{C}_3$  plant  
769 foliar carbon isotope composition of grasslands on the Qinghai-Tibet Plateau, China. *Alp. Bot.* 121, 79.  
770 doi.org/10.1007/s00035-011-0093-5, 2011.

771 Zhu, Y., Jiang, Y., Liu, Q., Kang, M., Spehn, E.M., Körner, C.: Elevational Trends of Biodiversity and Plant Traits Do Not  
772 Converge—A Test in the Helan Range, NW China. *Plant Ecol.* 205, 273–283, 2009.

**Table 1** General characteristics of ecosystems investigated at Mt. Kilimanjaro, Tanzania.

| Ecosystem                                   | Land-use type                              | Elevation<br>(m a.s.l.) | MAP (mm)    | MAT (°C)   | Soil properties |                            |             |             |                          |                          |            |
|---------------------------------------------|--------------------------------------------|-------------------------|-------------|------------|-----------------|----------------------------|-------------|-------------|--------------------------|--------------------------|------------|
|                                             |                                            |                         |             |            | Soil type       | pH<br>(CaCl <sub>2</sub> ) | Clay<br>(%) | Sand<br>(%) | Organic<br>carbon<br>(%) | Total<br>nitrogen<br>(%) | C/N ratio  |
| <i>Savanna</i><br>(Sav)                     | (M) extensive<br>grazing, grass<br>cutting | 971 (40)                | 764 (50)    | 23.7 (0.3) | Leptosol        | 6.6 (0.3)                  | 27.3 (4.0)  | 39.3 (8.7)  | 3.5 (0.4)                | 0.2 (0.0)                | 13.5 (0.2) |
| Maize field<br>(Mai)                        | (M) cropped<br>agriculture                 | 938 (25)                | 674 (34)    | 23.6 (0.4) | Nitisol         | 5.6 (0.3)                  | 37.4 (4.5)  | 20.3 (7.7)  | 1.6 (0.2)                | 0.1 (0.0)                | 11.8 (0.1) |
| Coffee plantation<br>(Cof)                  | (M) cropped<br>agriculture                 | 1,349 (78)              | 1,393 (96)  | 19.8 (0.7) | Vertisol        | 4.5 (0.3)                  | 45.2 (8.0)  | 17.8 (4.5)  | 4.2 (0.4)                | 0.4 (0.0)                | 10.5 (0.2) |
| Homegarden<br>(Hom)                         | (M) cropped<br>agroforestry                | 1,478 (112)             | 1,656 (177) | 18.7 (0.8) | Andosol         | 5.4 (0.4)                  | 45.4 (8.0)  | 16.5 (5.8)  | 6.7 (1.3)                | 0.6 (0.1)                | 11.5 (0.4) |
| Grassland<br>(Gra)                          | (M) extensive<br>grazing, grass<br>cutting | 1,506 (84)              | 1,610 (135) | 18.9 (0.7) | Umbrisol        | 5.1 (0.4)                  | 48.1 (8.1)  | 16.0 (5.1)  | 5.3 (2.1)                | 0.4 (0.2)                | 12.6 (0.2) |
| Lower montane<br>forest (Flm)               | (S-N) montane<br>forest                    | 1,806 (71)              | 2,201 (33)  | 15.5 (0.3) | Andosol         | 4.7 (0.3)                  | 47.3 (5.2)  | 14.5 (2.2)  | 22.7 (4.9)               | 1.6 (0.2)                | 13.3 (1.5) |
| <i>Ocotea</i> forest<br>(Foc)               | (S-N) montane<br>forest                    | 2,464 (106)             | 2,388 (73)  | 11.5 (0.4) | Andosol         | 3.5 (0.2)                  | 52.3 (4.5)  | 10.4 (2.3)  | 40.2 (1.5)               | 2.7 (0.1)                | 14.9 (0.7) |
| <i>Ocotea</i> forest<br>disturbed<br>(Fod)  | (S-N) montane<br>forest                    | 2,378 (56)              | 2,334 (35)  | 11.9 (0.4) | Andosol         | 3.6 (0.2)                  | 53.9 (3.4)  | 10.1 (2.5)  | 32.0 (1.8)               | 2.2 (0.2)                | 15.1 (1.3) |
| <i>Podocarpus</i> forest<br>(Fpg)           | (S-N) montane<br>forest                    | 2,856 (41)              | 2,036 (27)  | 9.6 (0.2)  | Andosol         | 3.8 (0.1)                  | 48.7 (1.1)  | 9.4 (1.3)   | 37.0 (1.0)               | 2.4 (0.1)                | 15.5 (0.8) |
| <i>Podocarpus</i> forest<br>disturbed (Fpd) | (S-N) montane<br>forest                    | 2,904 (48)              | 2,056 (29)  | 9.7 (0.3)  | Andosol         | 4.0 (0.2)                  | 45.8 (3.4)  | 12.6 (3.3)  | 33.8 (2.3)               | 1.7 (0.0)                | 19.9 (1.4) |
| <i>Erica</i> forest<br>(Fer)                | (S-N) montane<br>forest                    | 3,716 (77)              | 1,517 (54)  | 6.2 (0.6)  | Andosol         | 3.9 (0.2)                  | 29.5 (5.1)  | 24.1 (6.2)  | 28.1 (2.4)               | 1.5 (0.1)                | 18.9 (0.7) |
| <i>Helichrysum</i><br>vegetation (Hel)      | (S-N) alpine<br>scrub vegetation           | 4,250 (100)             | 1,293 (31)  | 4.2 (0.4)  | Andosol         | 5.7 (0.3)                  | 7.9 (1.4)   | 69.9 (9.5)  | 6.1 (3.3)                | 0.3 (0.2)                | 12.0 (1.1) |

774 Land uses are generically classified as managed (M) and semi-natural ecosystems (S-N). MAP and MAT stand for mean annual precipitation and temperature respectively.  
775 Climatic values are according to Appelhans et al. (2016). Data represent mean values ( $n = 5 \pm SE$ ) for different ecosystems. The most representative soil type is shown for each  
776 ecosystem. Soil properties are given for topsoil (0 – 10 cm for pH and soil texture, 0 – 5 cm for soil organic carbon and total nitrogen).

Deleted: d



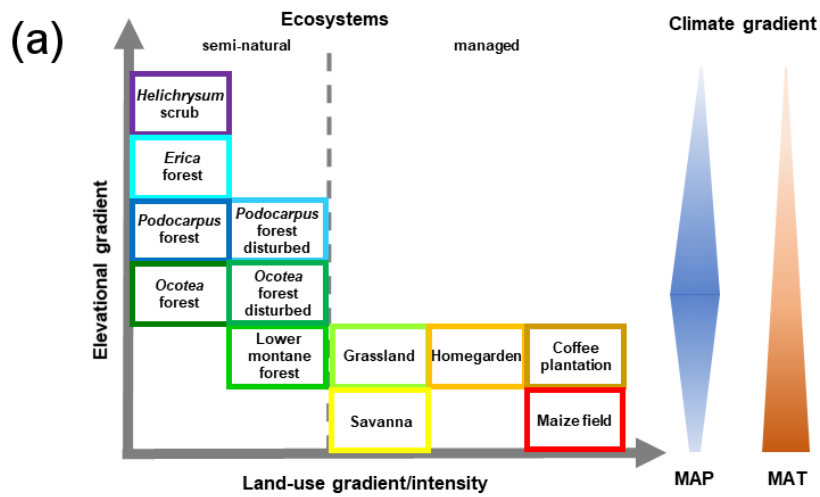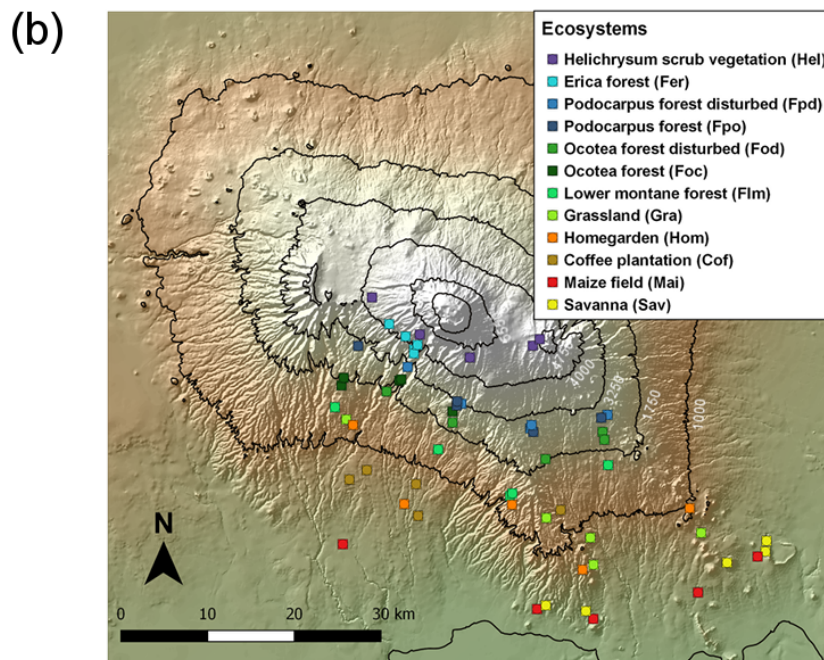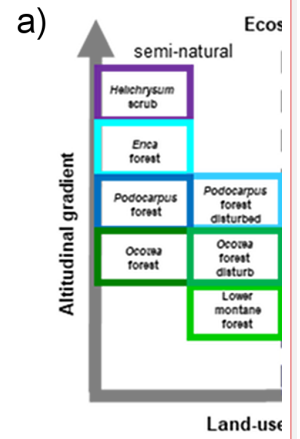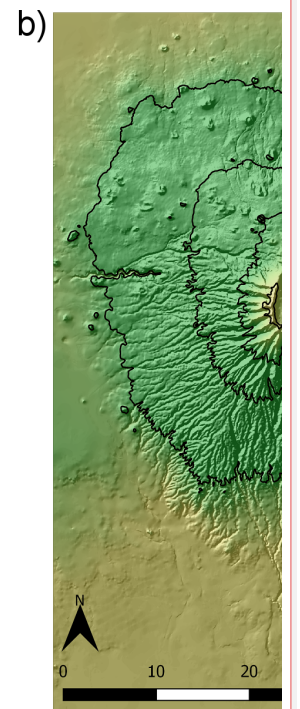

Deleted:  
Formatted: Font:(Default) Times New Roman, 10 pt, Bold

778

779 **Figure 1:** Geographical distribution of investigated ecosystems: a) along the elevational and land-use gradient. MAP denotes  
780 mean annual precipitation and MAT mean annual temperature. Colours of boxes framing ecosystems' names match  
781 colours of symbols in the GeoTIFF panel below; b) along the southern slope of Mt. Kilimanjaro. Symbols represent individual  
782 ecosystems (12) replicated 5 times (60 study sites in total).

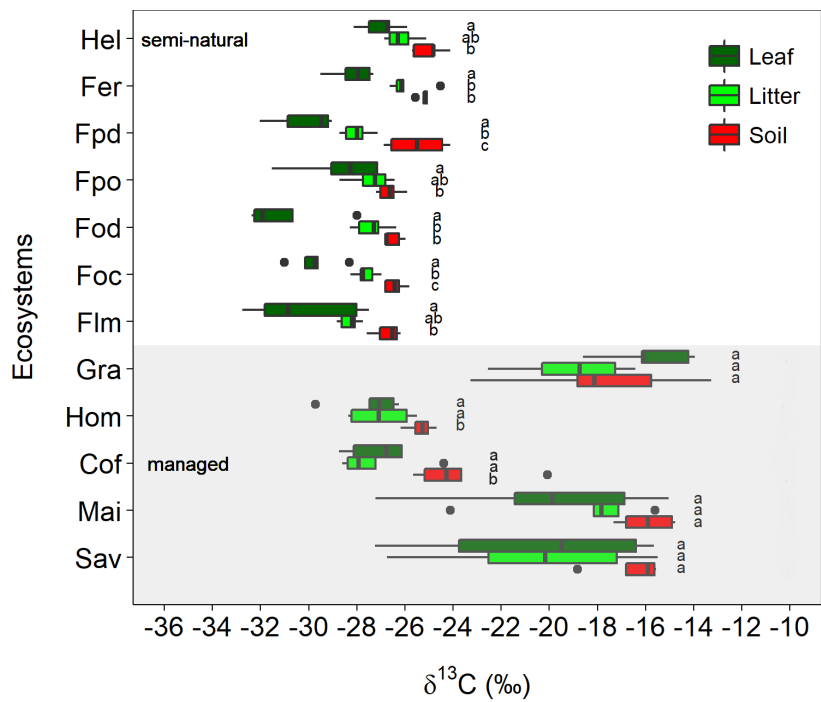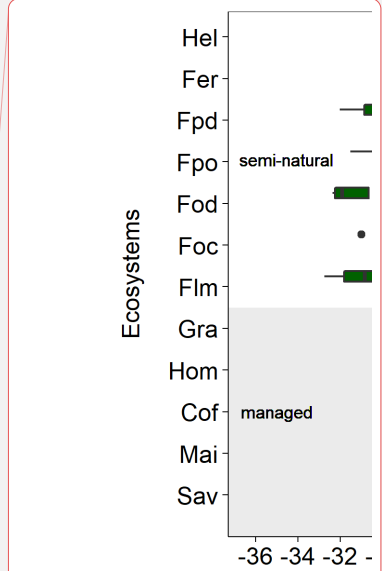

**Deleted:**  
**Formatted:** Font:(Default) Times Roman, 12 pt, Font color: Black

784  
 785 **Figure 2:** Variation in  $\delta^{13}\text{C}$  values for leaves, litter, and soil along the Kilimanjaro elevational and land-use gradient.  
 786 Ecosystem data represent the average values of five sites (one per each transect), with each site being composed of five  
 787 samples ( $n = 5$ ). Boxplots show median values per ecosystem with whiskers representing 1<sup>st</sup> and 3<sup>rd</sup> quartiles. Dots represent  
 788 outliers. The shaded region represents managed ecosystems (both intensively and extensively), while those un-shaded  
 789 indicate semi-natural ecosystems. Lower case letters show significant differences between sampled materials within each  
 790 ecosystem (one-way ANOVA followed by Tukey's HSD test as a post hoc procedure,  $P \leq 0.05$ ). The ecosystem acronyms  
 791 used are as per Table 1. Mai, Cof, and Hom are managed cropping sites, Gra and Sav are extensively managed grasslands and  
 792 savannas, while the rest represent semi-natural ecosystems. Sites are ordered by increasing altitude.  
 793

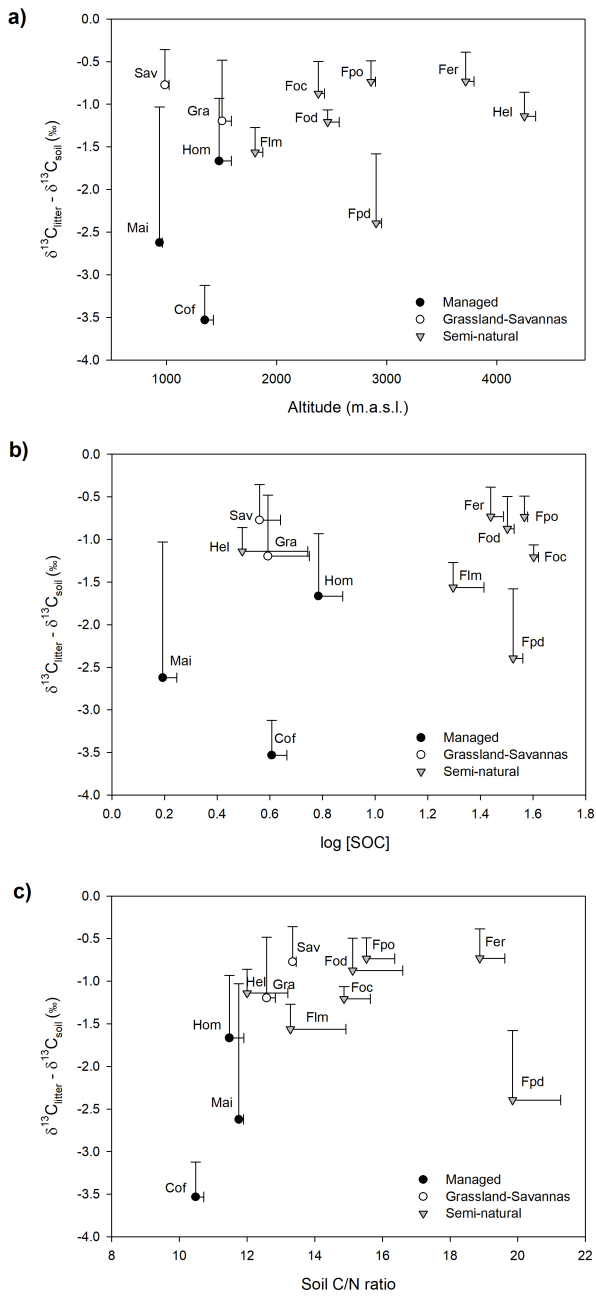

795

796

797

798

**Figure 3:** a) Variation in  $\delta^{13}C$ -based enrichment factors ( $\delta^{13}C_{\text{litter-soil}}$ ) with elevation; b) Relationship between  $\delta^{13}C$ -based enrichment factors ( $\delta^{13}C_{\text{litter-soil}}$ ) and SOC concentration (log SOC); and c) Relationship between  $\delta^{13}C$ -based enrichment factors ( $\delta^{13}C_{\text{litter-soil}}$ ) and soil C/N ratios. Note: A savanna site with large  $C_3$  influence was removed from the figure for clarity.

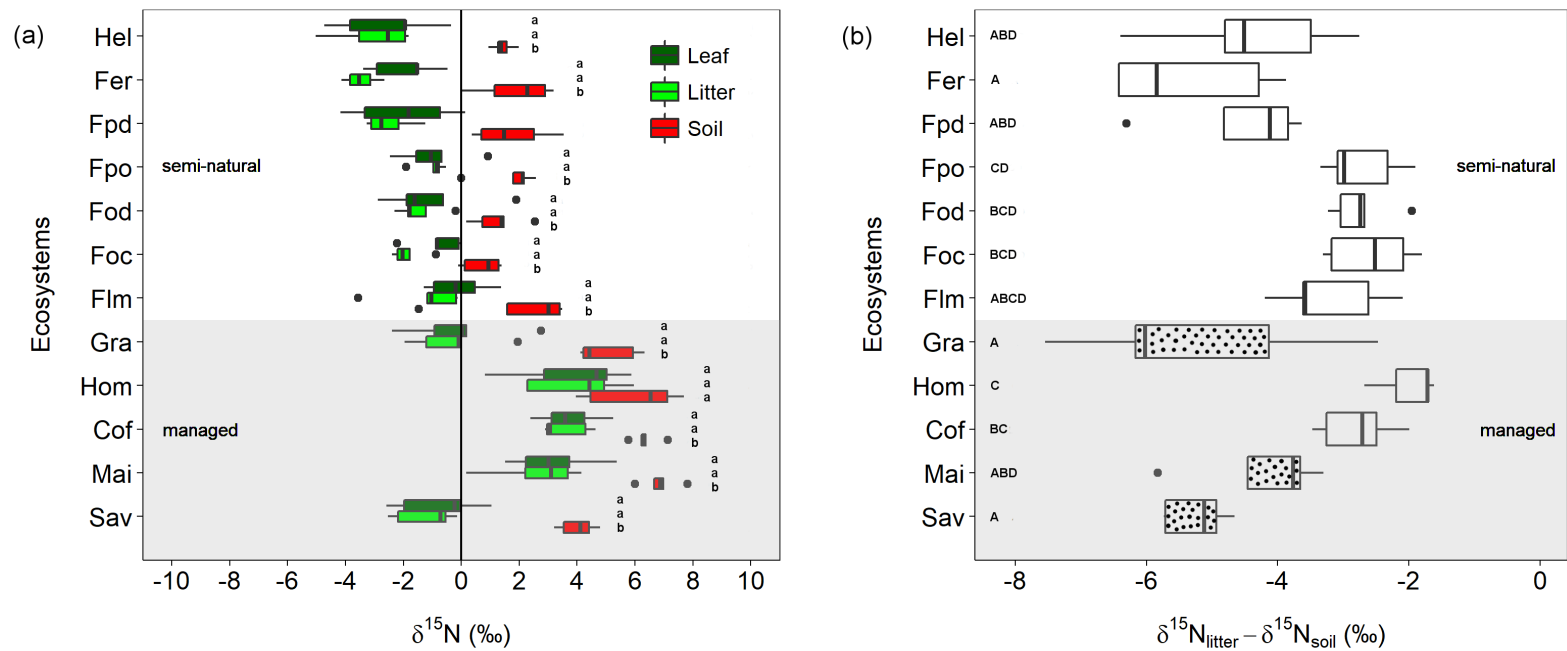

799  
 800 **Figure 4:** Variation in  $\delta^{15}\text{N}$  values and  $\delta^{15}\text{N}$ -based enrichment factors along the Kilimanjaro elevational and land-use gradient. a) Variation in  $\delta^{15}\text{N}$  values for leaves, litter, and soil material sampled  
 801 along the Kilimanjaro elevational and land-use gradient. Boxplots show median values per ecosystem with whiskers representing 1<sup>st</sup> and 3<sup>rd</sup> quartiles. Dots represent outliers. Ecosystem data  
 802 represent the average values of five sites (one per each transect), with each site being composed of five samples. Lower case letters show significant differences between sampled materials within  
 803 each ecosystem (one-way ANOVA followed by Tukey's HSD test as a post hoc procedure,  $P \leq 0.05$ ); b) Variation in  $\delta^{15}\text{N}$ -based enrichment factors ( $\delta^{15}\text{N}_{\text{litter-soil}}$ ) calculated for the different  
 804 ecosystems along the elevational and land use gradient. Dotted boxplots indicate ecosystems dominated by  $C_4$  vegetation. Capital letters indicate significant differences between ecosystems (one-  
 805 way ANOVA followed by Tukey's HSD test as a post hoc procedure,  $P \leq 0.05$ ). The ecosystem acronyms used are the same as those in Table 1. Sites are ordered by increasing altitude.

Deleted: 3

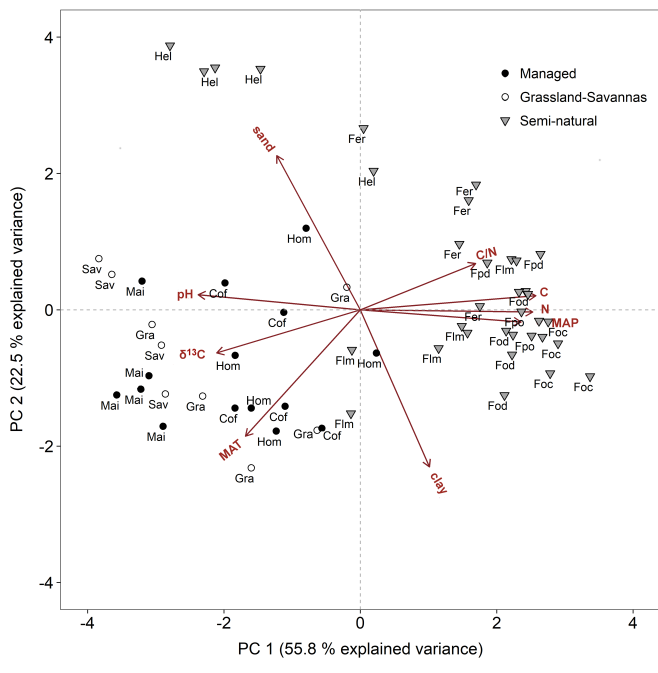

807

808 **Figure 5:** Principal component analysis bi-plot for soil and climate variables potentially controlling soil  $\delta^{15}\text{N}$ . Symbols are as  
 809 per all previous figures. Acronyms are as per Table 1. C/N = soil C/N ratio, C = soil carbon content, N = soil nitrogen  
 810 content, MAP = mean annual precipitation, clay = soil clay content, MAT = mean annual temperature,  $\delta^{13}\text{C}$  = soil  $\delta^{13}\text{C}$ , and  
 811 pH = soil pH.

812

Deleted: 4

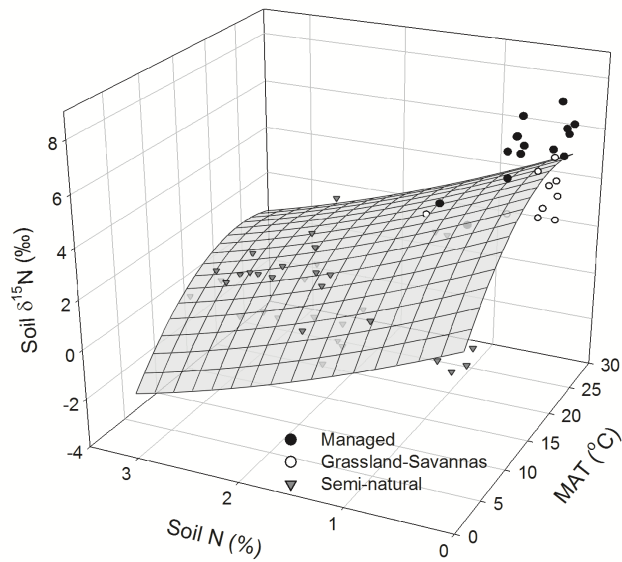

814

815 **Figure 6:** Measured and modelled soil  $\delta^{15}\text{N}$  values predicted as a function of soil N abundance and mean annual temperature  
 816 (MAT). Data points are classified by generic land uses (i.e. intensively managed cropping sites, extensively managed  
 817 grassland and savannas, and semi-natural ecosystems) observed along the elevational and land use gradient. The regression  
 818 takes the following form:  $\text{soil } \delta^{15}\text{N} = 1.10 + 0.49 (\text{MAT}) - 1.86 (\text{soil N}) - 0.01 (\text{MAT})^2 + 0.14 (\text{soil N})^2$ ; ( $r^2 \text{ adj} = 0.68$ ,  $P <$   
 819  $0.05$ ,  $n = 60$ ).

Deleted: 5

1 **Appendix – Fertilizer and pesticide isotopic composition**

2 Fertilizers

3 A general indication of fertilizer used in the region is provided here.

4 Giller et al. (1998) reported an estimate of ca. 40 kg N ha<sup>-1</sup> inorganic fertilizer use in the  
5 Kilimanjaro region. A more recent report by Senkoro et al. (2017) indicate a generic fertilizer  
6 use of 17 kg ha<sup>-1</sup> y<sup>-1</sup> on a country basis, with about 12% of the national fertilizer share being used  
7 in the Kilimanjaro and Arusha regions. Urea (48% N) and diammonium phosphate (18% N)  
8 accounted for about half the total volume of fertilizer used in 2010. The nitrogen isotopic values  
9 of both fertilizers is ~0 ‰ (Bateman and Kelly, 2007), and as such does not pose a significant  
10 additional bias on the interpretation of soil δ<sup>15</sup>N values. However, the addition of manure (δ<sup>15</sup>N  
11 ~8 ‰) in Hom systems, albeit used in low quantities (Gütlein et al., 2018), may have well  
12 contributed to the high δ<sup>15</sup>N values observed in this ecosystem (Fig. 4).

13 Bateman, A. S., and Kelly, S. D. (2007). Fertilizer nitrogen isotope signatures. *Isotopes in environmental*  
14 and health studies, 43(3), 237-247.

15 Giller et al. (1998). Environmental constraints to nodulation and nitrogen fixation of *Phaseolus vulgaris* L  
16 in Tanzania II. Response to N and P fertilizers and inoculation with *Rhizobium*. *African Crop Science*  
17 *Journal*, 6(2), 171-178.

18 Gütlein et al (2018). Impacts of climate and land use on N<sub>2</sub>O and CH<sub>4</sub> fluxes from tropical ecosystems in  
19 the Mt. Kilimanjaro region, Tanzania. *Glob. Change Biol.* 24, 1239–1255.

20 Senkoro et al (2017). Optimizing fertilizer use within the context of integrated soil fertility management  
21 in Tanzania. *Fertilizer use optimization in Sub-Saharan Africa. CAB International, Nairobi, Kenya,*  
22 176-192.

23

24 Pesticides

25 The isotopic values of the two most commonly used pesticides are shown below. The actual  
26 product values may strongly depend on the manufacturer, which as in the case of δ<sup>13</sup>C can be  
27 quite different for glyphosate.

|            | δ <sup>13</sup> C (‰)      | δ <sup>15</sup> N (‰)    |
|------------|----------------------------|--------------------------|
| Glyphosate | -24.0 ; -34.0 <sup>1</sup> | -3.6 <sup>2</sup>        |
| Atrazine   | -28.9 ; -27.9 <sup>3</sup> | -0.2 ; -1.5 <sup>3</sup> |

28 <sup>1</sup> Kujawinski, D. M., Wolbert, J. B., Zhang, L., Jochmann, M. A., Widory, D., Baran, N., & Schmidt, T. C. (2013).  
29 Carbon isotope ratio measurements of glyphosate and AMPA by liquid chromatography coupled to isotope ratio  
30 mass spectrometry. *Analytical and bioanalytical chemistry*, 405(9), 2869-2878.

31 <sup>2</sup> Tavares, C. R. D. O., Bendassolli, J. A., Ribeiro, D. N., & Rossete, A. L. R. M. (2010). 15N-labeled glyphosate  
32 synthesis and its practical effectiveness. *Scientia Agricola*, 67(1), 96-101

33 <sup>3</sup> Meyer, A. H., Penning, H., Lowag, H., & Elsner, M. (2008). Precise and accurate compound specific carbon and  
34 nitrogen isotope analysis of atrazine: critical role of combustion oven conditions. *Environmental science &*  
35 *technology*, 42(21), 7757-7763.

36

37 **Appendix – Tables and Figures**

38 **Table S1** Pearson’s correlations coefficients (r) between soil, litter, leaf, and climatic parameters. Correlation analysis was conducted with all five  
 39 replicates of each of the twelve ecosystems (n = 60)

| Variable      | Soil                  |           |                       |           |           | Litter                |           |                       |           |           | Leaf                  |           |                       |           |           |          |
|---------------|-----------------------|-----------|-----------------------|-----------|-----------|-----------------------|-----------|-----------------------|-----------|-----------|-----------------------|-----------|-----------------------|-----------|-----------|----------|
|               | $\delta^{15}\text{N}$ | N content | $\delta^{13}\text{C}$ | C content | C/N ratio | $\delta^{15}\text{N}$ | N content | $\delta^{13}\text{C}$ | C content | C/N ratio | $\delta^{15}\text{N}$ | N content | $\delta^{13}\text{C}$ | C content | C/N ratio |          |
| <b>Soil</b>   | $\delta^{15}\text{N}$ | -0.70***  | 0.52***               | -0.76***  | -0.54***  | 0.82***               | -0.13     | 0.44***               | -0.72***  | -0.06     | 0.75***               | 0.21      | 0.47***               | -0.38**   | -0.27*    |          |
|               | N content             |           | -0.63***              | 0.96***   | 0.38**    | -0.44***              | 0.49***   | -0.56***              | 0.72***   | -0.26*    | -0.38**               | 0.21      | -0.61***              | 0.34**    | -0.15     |          |
|               | $\delta^{13}\text{C}$ |           |                       | -0.61***  | 0.01      | 0.18                  | -0.60***  | 0.79***               | -0.43***  | 0.51***   | 0.15                  | -0.31*    | 0.76***               | -0.49***  | 0.28*     |          |
|               | C content             |           |                       |           | 0.56***   | -0.53***              | 0.38**    | -0.54***              | 0.76***   | -0.17     | -0.45***              | 0.07      | -0.59***              | 0.42***   | -0.04     |          |
|               | C/N ratio             |           |                       |           |           | -0.59***              | -0.19     | -0.15                 | 0.51***   | 0.303*    | -0.54***              | -0.40**   | -0.14                 | 0.39**    | 0.40**    |          |
| <b>Litter</b> | $\delta^{15}\text{N}$ |           |                       |           |           |                       | 0.26*     | 0.13                  | -0.68***  | -0.48***  | 0.92***               | 0.53***   | 0.20                  | -0.25     | -0.57***  |          |
|               | N content             |           |                       |           |           |                       |           | -0.66***              | 0.26*     | -0.87***  | 0.26*                 | 0.73***   | -0.61***              | 0.21      | -0.64***  |          |
|               | $\delta^{13}\text{C}$ |           |                       |           |           |                       |           |                       | -0.42***  | 0.54***   | 0.14                  | -0.36**   | 0.88***               | -0.54***  | 0.22      |          |
|               | C content             |           |                       |           |           |                       |           |                       |           | 0.11      | -0.57***              | -0.05     | -0.49***              | 0.39**    | 0.08      |          |
|               | C/N ratio             |           |                       |           |           |                       |           |                       |           |           | -0.42***              | -0.69***  | 0.47***               | -0.12     | 0.63***   |          |
| <b>Leaf</b>   | $\delta^{15}\text{N}$ |           |                       |           |           |                       |           |                       |           |           | 0.53***               | 0.17      | -0.17                 | -0.61***  |           |          |
|               | N content             |           |                       |           |           |                       |           |                       |           |           |                       | -0.44***  | -0.13                 | -0.92***  |           |          |
|               | $\delta^{13}\text{C}$ |           |                       |           |           |                       |           |                       |           |           |                       |           | -0.44***              | 0.30*     |           |          |
|               | C content             |           |                       |           |           |                       |           |                       |           |           |                       |           |                       | 0.19      |           |          |
|               | C/N ratio             |           |                       |           |           |                       |           |                       |           |           |                       |           |                       |           |           |          |
| <b>Soil</b>   | pH                    | 0.51***   | -0.76***              | 0.65***   | -0.78***  | -0.28*                | 0.26*     | -0.51***              | 0.44***   | -0.55***  | 0.34**                | 0.20      | -0.24                 | 0.45***   | -0.40**   | 0.26*    |
|               | clay content          | 0.14      | 0.33**                | -0.23     | 0.27*     | -0.10                 | 0.32*     | 0.37**                | -0.12     | 0.02      | -0.34**               | 0.31*     | 0.44***               | -0.16     | -0.06     | -0.46*** |
|               | silt content          | 0.01      | 0.27*                 | -0.04     | 0.30*     | 0.20                  | 0.08      | 0.22                  | 0.02      | 0.14      | -0.23                 | 0.09      | 0.15                  | -0.01     | 0.05      | -0.24    |
|               | sand content          | -0.12     | -0.43***              | 0.22      | -0.39**   | -0.04                 | -0.31*    | -0.43***              | 0.09      | -0.10     | 0.41**                | -0.31*    | -0.45***              | 0.14      | 0.02      | 0.52***  |
|               | MAP                   | -0.60***  | 0.81***               | -0.72***  | 0.76***   | 0.19                  | -0.32*    | 0.58***               | -0.65***  | 0.50***   | -0.44***              | -0.27*    | 0.33**                | -0.60***  | 0.34**    | -0.26*   |
| MAT           | 0.73***               | -0.54***  | 0.66***               | -0.60***  | -0.33**   | 0.67***               | -0.16     | 0.55***               | -0.62***  | 0.05      | 0.61***               | 0.25      | 0.55***               | -0.48***  | -0.33*    |          |

40 Levels of significance: \* P < 0.05, \*\* P < 0.01, \*\*\* P < 0.001



**Table S2** Correlation coefficients (r) and P values of selected variables included in the principal component analysis used to identify the main factors driving soil  $\delta^{15}\text{N}$ . Only variables showing  $r > 0.5$  were considered

| Principal component | Variable                   | r     | P value |
|---------------------|----------------------------|-------|---------|
| PC 1                | Soil C content             | 0.93  | <0.001  |
|                     | Soil N content             | 0.93  | <0.001  |
|                     | Soil C/N ratio             | 0.61  | <0.001  |
|                     | Soil pH                    | -0.87 | <0.001  |
|                     | Soil $\delta^{13}\text{C}$ | -0.76 | <0.001  |
|                     | MAP                        | 0.87  | <0.001  |
|                     | MAT                        | -0.63 | <0.001  |
| PC 2                | Soil clay content          | -0.84 | <0.001  |
|                     | Soil sand content          | 0.82  | <0.001  |
|                     | MAT                        | -0.65 | <0.001  |

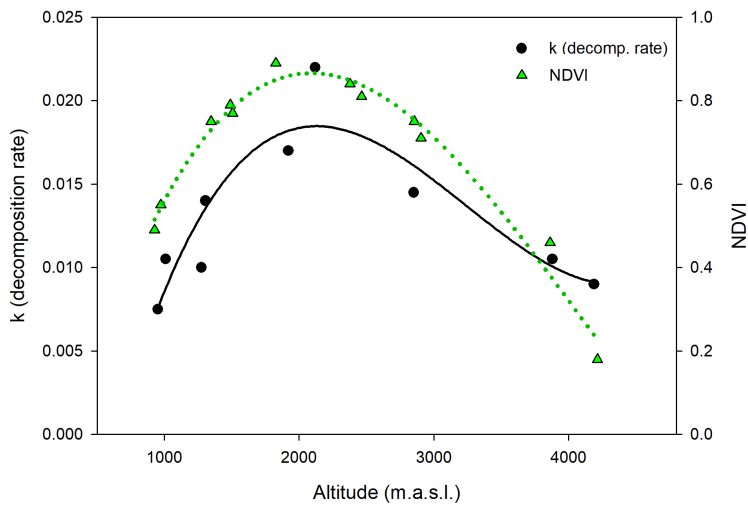

**Fig. S1** Annual means of Tea Bag Index decomposition rate constant ( $k$ ) reported by Becker and Kuzyakov (2018), and Normalized Difference Vegetation Index (NDVI) calculated by Röder et al. (2017) as a proxy for primary productivity (Kerr and Ostrovsky, 2003) for the same ecosystems studied in the Kilimanjaro land-use and elevational gradient. Solid and dotted line corresponds to  $k$  and NDVI 3rd degree polynomial regressions;  $r^2$  0.82 and 0.78 respectively.

References:

Becker, J. N., and Kuzyakov, Y. (2018). Teatime on Mount Kilimanjaro: Assessing climate and land-use effects on litter decomposition and stabilization using the Tea Bag Index. *Land Degradation & Development*, 29(8), 2321-2329.

Kerr, J. T., and Ostrovsky, M. (2003). From space to species: ecological applications for remote sensing. *Trends in ecology & evolution*, 18(6), 299-305.

Röder, J., Detsch, F., Otte, I., Appelhans, T., Nauss, T., Peters, M. K., & Brandl, R. (2017). Heterogeneous patterns of abundance of epigeic arthropod taxa along a major elevation gradient. *Biotropica*, 49(2), 217-228.

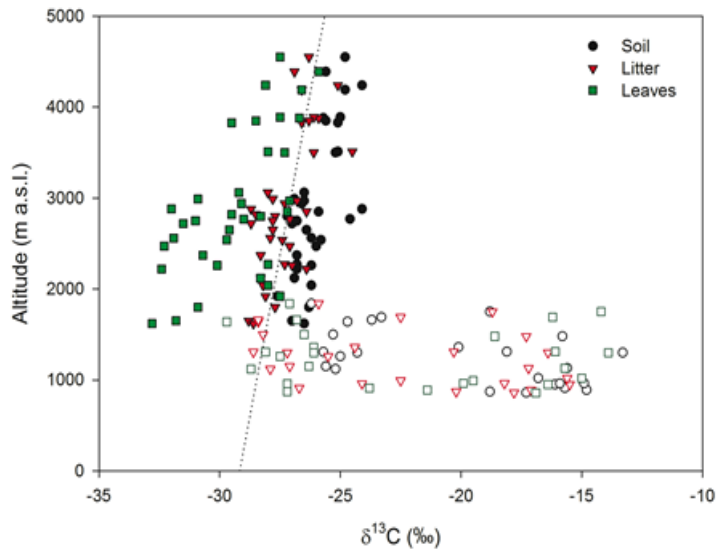

**Fig. S2** Variation in  $\delta^{13}\text{C}$  values along the Kilimanjaro land-use and elevational gradient for leaves, litter, and soil. Solid symbols denote semi-natural ecosystems, while open symbols correspond to managed ecosystems. The dotted line represents the theoretical global relationship between altitude and  $\delta^{13}\text{C}$  of plant leaves ( $\text{C}_3$  vegetation only) developed by Körner et al. (1988) and is shown here for reference. The ecosystem acronyms used are as per Table 1. Mai, Cof, and Hom are managed cropping sites, Gra and Sav are extensively managed grasslands and savannas, while the rest represent semi-natural ecosystems. *Reference:* Körner, C., Farquhar, G.D., Roksandic, Z., 1988. A global survey of carbon isotope discrimination in plants from high altitude. *Oecologia* 74, 623–632. <https://doi.org/10.1007/BF00380063>.

Saiz, Gustavo 25.12.2018 18:34

Deleted: S1

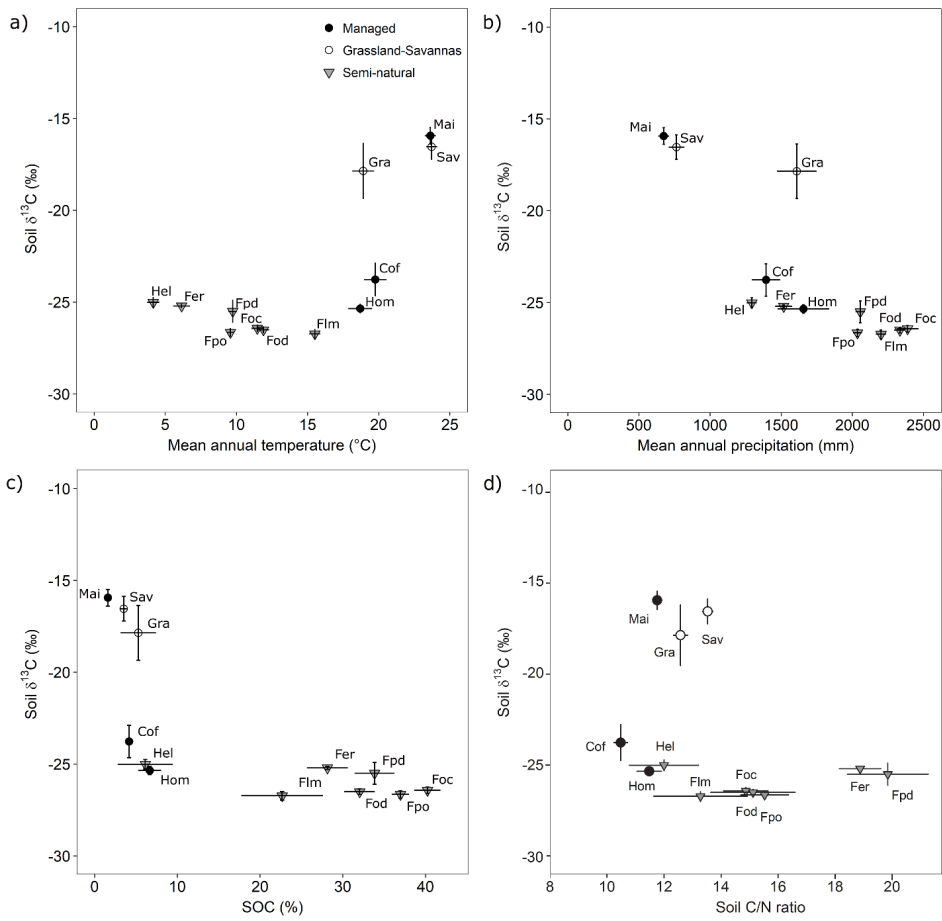

**Fig. S3** Relationship between soil  $\delta^{13}\text{C}$  values and mean annual temperature (a), mean annual precipitation (b), soil organic carbon (c), and soil C/N ratios (d) for all ecosystems. Each data point represents the average of five sites, and bars denote standard error of the means. Symbols are as per all previous figures. The ecosystem acronyms used are as per Table 1.

Saiz, Gustavo 25.12.2018 18:34

Deleted: S2

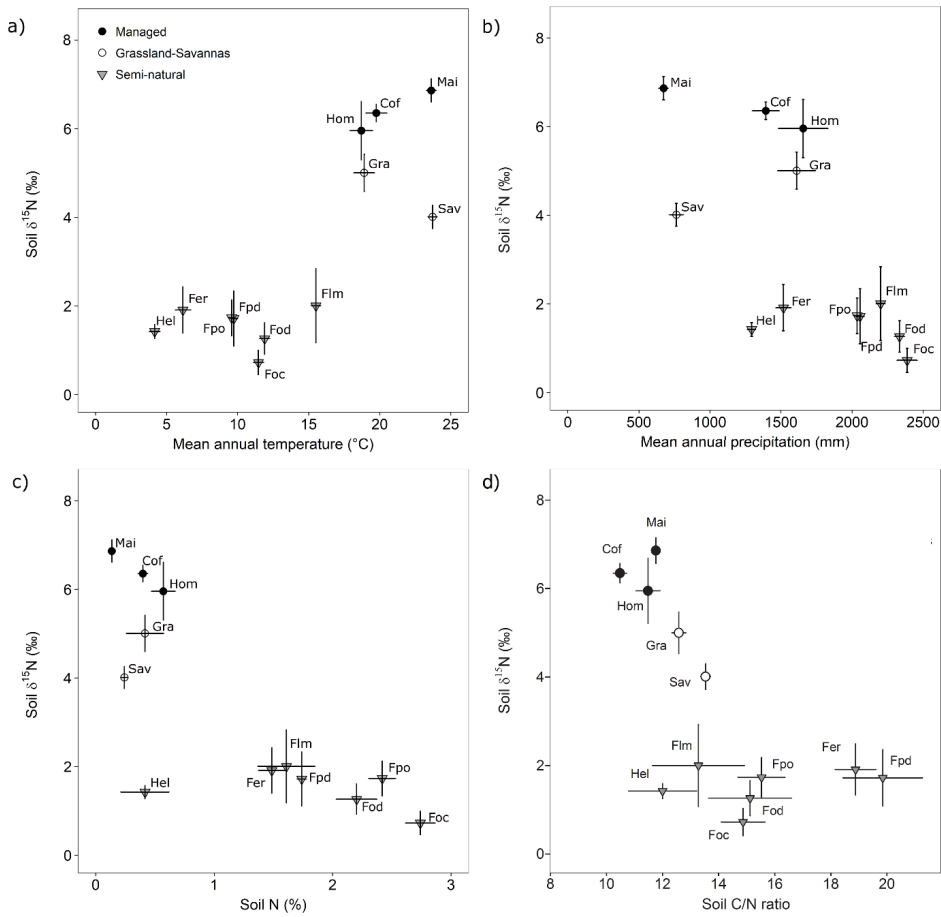

**Fig. S4** Relationship between soil  $\delta^{15}\text{N}$  values and mean annual temperature (a), mean annual precipitation (b), soil nitrogen (c), and soil C/N ratios (d) for all ecosystems. Each data point represents the average of five sites, and bars denote standard error of the means. Symbols are as per all previous figures. The ecosystem acronyms used are as per Table 1.

Saiz, Gustavo 25.12.2018 18:34

Deleted: S3
